# Supplementary material for: (S)-Proline-catalyzed nitro-Michael reactions: towards a better understanding of the catalytic mechanism and enantioselectivity
Source: Royal Society of Chemistry journal article supplement (doi:10.1039/c2ob06993h), 2012-01-01
Supplement: c2ob06993h.pdf [file c2ob06993h.pdf]

## (S)-Proline-Catalyzed Nitro-Michael Reactions: Towards a Better Understanding of the Catalytic Mechanism and Enantioselectivity

Hui Yang and Ming Wah Wong\*

*Department of Chemistry, National University of Singapore, 3 Science Drive 3, Singapore 117543*

### Supporting Information

**Table S1.** Cartesian coordinates, total energies (E, Hartrees) and number of imaginary frequencies (in parenthesis) of the M06-2X/6-31G\*\* optimized geometries of all calculated structures.

| <b>TS1-<i>a1</i>-RS</b> E = -1031.6034955 (1) |           |           |           | <b>TS1-<i>a1</i>-SR</b> E = -1031.5956026 (1) |           |           |           |
|-----------------------------------------------|-----------|-----------|-----------|-----------------------------------------------|-----------|-----------|-----------|
| C                                             | -3.002192 | 1.138477  | -1.229298 | C                                             | -2.887746 | 0.597634  | 0.698302  |
| H                                             | -2.506700 | 1.154768  | -2.204083 | H                                             | -3.358053 | 0.816372  | 1.666445  |
| H                                             | -3.483840 | 2.105733  | -1.044230 | C                                             | -0.871786 | 1.924334  | 0.838690  |
| C                                             | -3.875727 | -0.366045 | 0.428967  | H                                             | -0.490467 | 2.213393  | 1.825507  |
| C                                             | -2.387016 | -0.155048 | 0.759154  | H                                             | -0.040317 | 1.947574  | 0.132529  |
| H                                             | -2.223580 | 0.199473  | 1.779914  | N                                             | -1.425571 | 0.561395  | 0.901918  |
| N                                             | -1.987572 | 0.899704  | -0.185156 | C                                             | -0.755281 | -0.490176 | 1.365044  |
| C                                             | -0.995327 | 1.763444  | 0.028260  | H                                             | -1.343743 | -1.393897 | 1.501974  |
| C                                             | 0.097424  | 1.533186  | 0.862838  | C                                             | 0.626095  | -0.496706 | 1.546714  |
| H                                             | 0.016952  | 0.698685  | 1.559971  | H                                             | 1.115262  | 0.466979  | 1.667325  |
| C                                             | 0.932174  | 2.708319  | 1.305654  | C                                             | 1.269061  | -1.666939 | 2.242302  |
| H                                             | 0.492496  | 3.202431  | 2.177272  | H                                             | 0.745462  | -2.595844 | 1.996482  |
| H                                             | 1.940376  | 2.390563  | 1.582465  | H                                             | 1.256360  | -1.549663 | 3.330346  |
| C                                             | 1.355332  | 0.516419  | -0.473654 | H                                             | 2.315636  | -1.772068 | 1.940534  |
| H                                             | 1.577838  | 1.430439  | -1.018165 | C                                             | -3.044319 | 1.795899  | -0.230007 |
| C                                             | 0.594592  | -0.434744 | -1.166492 | H                                             | -4.070647 | 2.165201  | -0.252820 |
| H                                             | 0.557684  | -1.486774 | -0.931079 | C                                             | -3.517347 | -0.754478 | 0.293330  |
| N                                             | -0.269514 | -0.007367 | -2.131163 | O                                             | -3.826419 | -1.519620 | 1.174447  |
| O                                             | -1.134767 | -0.820203 | -2.601261 | O                                             | -3.804150 | -0.964889 | -0.978559 |

|   |           |           |           |   |           |           |           |
|---|-----------|-----------|-----------|---|-----------|-----------|-----------|
| O | -0.247902 | 1.175045  | -2.511836 | H | -3.099941 | -0.612574 | -1.589148 |
| C | 2.412800  | 0.044891  | 0.450921  | C | 1.300850  | -0.717855 | -0.479030 |
| C | 4.464768  | -0.829893 | 2.138149  | H | 1.187551  | -1.791404 | -0.355683 |
| C | 2.210189  | -1.052446 | 1.298411  | C | 0.406992  | -0.124877 | -1.370316 |
| C | 3.646487  | 0.704374  | 0.470561  | H | 0.544024  | 0.806443  | -1.897720 |
| C | 4.669937  | 0.266137  | 1.305398  | N | -0.806301 | -0.728392 | -1.557074 |
| C | 3.233464  | -1.483966 | 2.133861  | O | -1.657566 | -0.176537 | -2.316845 |
| H | 1.246910  | -1.557272 | 1.319338  | O | -1.065024 | -1.780614 | -0.951416 |
| H | 3.804309  | 1.557711  | -0.183689 | C | 2.680057  | -0.193808 | -0.362549 |
| H | 5.625012  | 0.781077  | 1.304682  | C | 5.315366  | 0.741919  | -0.166061 |
| H | 3.066198  | -2.332842 | 2.788504  | C | 2.954716  | 1.179262  | -0.396869 |
| H | 5.259675  | -1.171513 | 2.793103  | C | 3.746232  | -1.088070 | -0.220054 |
| H | -4.471273 | 0.334631  | 1.021624  | C | 5.055345  | -0.624001 | -0.125584 |
| C | -1.601122 | -1.470646 | 0.649735  | C | 4.260076  | 1.643327  | -0.302335 |
| O | -1.018226 | -1.892010 | 1.622727  | H | 2.137077  | 1.889426  | -0.491413 |
| O | -1.692475 | -2.162174 | -0.477755 | H | 3.544338  | -2.155430 | -0.201462 |
| H | -1.620144 | -1.621493 | -1.335094 | H | 5.871227  | -1.331652 | -0.022174 |
| H | -1.020825 | 2.654495  | -0.594593 | H | 4.456817  | 2.710052  | -0.330371 |
| H | 1.012894  | 3.451000  | 0.505117  | H | 6.334635  | 1.105582  | -0.089599 |
| H | -4.205034 | -1.380373 | 0.661494  | H | -2.736939 | 1.522145  | -1.242538 |
| C | -3.975866 | -0.024779 | -1.061744 | C | -2.054777 | 2.795784  | 0.381473  |
| H | -4.989674 | 0.243745  | -1.362624 | H | -2.507229 | 3.290253  | 1.245690  |
| H | -3.650404 | -0.868748 | -1.673838 | H | -1.741909 | 3.568830  | -0.321703 |

---

**TS1- $\beta$ 1-RS** E = -1031.6033799 (1)

|   |           |           |           |
|---|-----------|-----------|-----------|
| C | -1.087960 | 1.967971  | -0.583449 |
| H | -0.994725 | 2.261812  | -1.636103 |
| H | -0.122127 | 2.111303  | -0.094278 |
| C | -3.437565 | 1.781568  | -0.108564 |
| H | -4.259015 | 1.963970  | 0.585343  |
| C | -2.820898 | 0.406528  | 0.094436  |
| H | -2.668760 | 0.217780  | 1.169347  |
| N | -1.491033 | 0.551120  | -0.531760 |
| C | -0.805513 | -0.426372 | -1.108698 |

---

**TS1- $\beta$ 1-SR** E = -1031.5895171 (1)

|   |           |           |           |
|---|-----------|-----------|-----------|
| C | -3.278546 | -1.469331 | -1.094999 |
| H | -3.659556 | -1.042756 | -2.023363 |
| H | -4.119644 | -1.679130 | -0.428288 |
| C | -2.448733 | -2.740907 | -1.301575 |
| H | -1.766087 | -2.625518 | -2.149355 |
| H | -3.063757 | -3.626668 | -1.467270 |
| C | -1.655065 | -2.818008 | -0.002172 |
| H | -0.731711 | -3.398238 | -0.068284 |
| H | -2.273830 | -3.210694 | 0.813070  |

|   |           |           |           |   |           |           |           |
|---|-----------|-----------|-----------|---|-----------|-----------|-----------|
| H | -1.298731 | -1.391554 | -1.168085 | C | -2.317071 | -0.503410 | -0.379560 |
| C | 0.540426  | -0.320337 | -1.460305 | H | -1.787153 | 0.151532  | -1.074079 |
| H | 0.947130  | 0.681708  | -1.575952 | N | -1.343975 | -1.407903 | 0.262720  |
| C | 1.155584  | -1.385960 | -2.329671 | C | -0.345996 | -1.003662 | 1.031589  |
| H | 0.723042  | -2.366158 | -2.106170 | H | 0.278813  | -1.803109 | 1.430171  |
| H | 2.235879  | -1.442062 | -2.168951 | C | 0.039673  | 0.328263  | 1.224938  |
| H | 0.992388  | -1.181321 | -3.391952 | H | -0.722064 | 1.072362  | 1.014673  |
| C | -3.622253 | -0.753826 | -0.503508 | C | 0.954671  | 0.655184  | 2.375754  |
| O | -4.454193 | -0.591233 | -1.356853 | H | 1.469610  | 1.601854  | 2.179678  |
| O | -3.324805 | -1.952539 | -0.007463 | H | 1.711396  | -0.121622 | 2.521337  |
| H | -2.600495 | -1.896145 | 0.661860  | H | 0.392649  | 0.772258  | 3.306148  |
| C | 1.363924  | -0.666297 | 0.429424  | C | -3.066892 | 0.323587  | 0.686551  |
| H | 1.224577  | -1.738343 | 0.315943  | O | -3.655582 | -0.236593 | 1.576281  |
| C | 0.606648  | -0.071711 | 1.447898  | O | -3.050347 | 1.638713  | 0.543977  |
| H | 0.851632  | 0.845359  | 1.961898  | H | -2.405792 | 1.947091  | -0.145854 |
| N | -0.572302 | -0.641793 | 1.838981  | C | 1.119667  | 2.115140  | -0.519643 |
| O | -0.946661 | -1.707687 | 1.264431  | H | 1.944213  | 2.742495  | -0.221914 |
| O | -1.274985 | -0.099263 | 2.706914  | C | 1.069042  | 0.710345  | -0.439876 |
| C | 2.746350  | -0.174654 | 0.202647  | H | 0.345692  | 0.249734  | -1.109064 |
| C | 5.377665  | 0.707025  | -0.192967 | N | -0.018845 | 2.807382  | -0.842766 |
| C | 3.050264  | 1.192052  | 0.213229  | O | -1.059459 | 2.141281  | -1.167672 |
| C | 3.778999  | -1.090382 | -0.020586 | O | -0.033281 | 4.034905  | -0.821407 |
| C | 5.086707  | -0.653100 | -0.213958 | C | 2.326684  | -0.070244 | -0.303105 |
| C | 4.354241  | 1.629684  | 0.020843  | C | 4.639099  | -1.638501 | -0.051376 |
| H | 2.254762  | 1.917489  | 0.367438  | C | 2.351405  | -1.391998 | -0.764332 |
| H | 3.553465  | -2.153208 | -0.027709 | C | 3.480634  | 0.453284  | 0.287936  |
| H | 5.877425  | -1.377367 | -0.379662 | C | 4.627145  | -0.326286 | 0.412431  |
| H | 4.574111  | 2.692204  | 0.032739  | C | 3.495501  | -2.171063 | -0.643726 |
| H | 6.395660  | 1.049519  | -0.345737 | H | 1.458090  | -1.802171 | -1.232370 |
| H | -3.819291 | 1.852992  | -1.131217 | H | 3.486603  | 1.473959  | 0.656588  |
| C | -2.233236 | 2.698800  | 0.123922  | H | 5.514925  | 0.095559  | 0.872056  |
| H | -2.372311 | 3.709534  | -0.262092 | H | 3.499112  | -3.190089 | -1.016952 |
| H | -2.019784 | 2.760243  | 1.195346  | H | 5.535372  | -2.242408 | 0.043897  |

---

| <b>TS1-β2-RS</b> E = -1031.58810471 (1) |           |           |           | <b>TS1-β2-SR</b> E = -1031.59139217 (1) |           |           |           |
|-----------------------------------------|-----------|-----------|-----------|-----------------------------------------|-----------|-----------|-----------|
| C                                       | 1.069502  | -1.182932 | -1.313029 | C                                       | -0.608949 | -1.926997 | -0.000166 |
| H                                       | 0.208520  | -1.672166 | -0.854011 | H                                       | -0.911555 | -1.005922 | 0.495768  |
| C                                       | 2.926217  | -1.723860 | 0.106305  | C                                       | -1.683616 | -2.451395 | -0.959922 |
| H                                       | 3.977186  | -1.995059 | 0.206437  | H                                       | -2.449345 | -3.010835 | -0.422284 |
| C                                       | 2.742688  | -0.203376 | 0.178977  | C                                       | 0.390485  | -2.444125 | -2.164124 |
| H                                       | 2.652192  | 0.154113  | 1.212177  | H                                       | 0.249655  | -1.708108 | -2.964348 |
| N                                       | 1.457741  | -0.001283 | -0.509814 | N                                       | 0.536322  | -1.697607 | -0.891895 |
| C                                       | 0.740769  | 1.110409  | -0.391176 | C                                       | 1.529790  | -0.841479 | -0.679069 |
| C                                       | -0.624215 | 1.178264  | -0.740533 | H                                       | 2.307226  | -0.839360 | -1.436856 |
| H                                       | -0.942271 | 0.456941  | -1.492661 | C                                       | 1.536190  | 0.115624  | 0.355373  |
| C                                       | -1.242783 | 2.551843  | -0.876961 | H                                       | 0.948401  | -0.142979 | 1.235231  |
| H                                       | -0.898366 | 3.206174  | -0.070046 | C                                       | 2.852377  | 0.796429  | 0.658907  |
| H                                       | -2.332470 | 2.485408  | -0.820954 | H                                       | 2.683475  | 1.717914  | 1.221859  |
| C                                       | -1.491541 | 0.386470  | 0.783007  | H                                       | 3.372717  | 1.053724  | -0.269083 |
| H                                       | -1.495909 | 1.315958  | 1.351504  | H                                       | 3.510695  | 0.159702  | 1.256193  |
| C                                       | -0.734372 | -0.641114 | 1.399369  | C                                       | -0.321202 | -2.957896 | 1.105806  |
| H                                       | -0.936594 | -1.699634 | 1.340549  | O                                       | -1.178778 | -3.276146 | 1.881275  |
| N                                       | 0.379790  | -0.288291 | 2.103687  | O                                       | 0.910707  | -3.485553 | 1.156165  |
| O                                       | 1.108508  | -1.158083 | 2.620807  | H                                       | 1.460741  | -3.097106 | 0.462156  |
| O                                       | 0.675057  | 0.936361  | 2.162842  | C                                       | 0.389890  | 1.525486  | -0.338238 |
| C                                       | -2.828096 | -0.001638 | 0.240699  | H                                       | 1.192563  | 1.975819  | -0.920421 |
| C                                       | -5.355150 | -0.719495 | -0.738694 | C                                       | -0.674876 | 1.035314  | -1.130558 |
| C                                       | -2.984897 | -1.130383 | -0.570942 | H                                       | -1.711346 | 0.978781  | -0.833557 |
| C                                       | -3.954558 | 0.766970  | 0.544999  | N                                       | -0.384279 | 0.524722  | -2.362885 |
| C                                       | -5.210599 | 0.409364  | 0.061455  | O                                       | 0.817194  | 0.532894  | -2.738943 |
| C                                       | -4.237095 | -1.489883 | -1.054224 | O                                       | -1.281130 | 0.010659  | -3.064775 |
| H                                       | -2.114868 | -1.731260 | -0.826783 | C                                       | 0.023590  | 2.288072  | 0.891458  |
| H                                       | -3.843997 | 1.643295  | 1.177874  | C                                       | -0.652102 | 3.761148  | 3.179180  |
| H                                       | -6.076074 | 1.013841  | 0.312430  | C                                       | -0.948158 | 1.818071  | 1.781812  |
| H                                       | -4.342285 | -2.370075 | -1.680186 | C                                       | 0.656590  | 3.502470  | 1.169916  |
| H                                       | -6.332722 | -0.998300 | -1.117688 | C                                       | 0.319315  | 4.236458  | 2.304096  |
| H                                       | 1.225688  | 1.935094  | 0.122337  | C                                       | -1.285935 | 2.548212  | 2.914775  |
| H                                       | -0.987045 | 3.021352  | -1.830609 | H                                       | -1.447644 | 0.871422  | 1.587588  |

|   |          |           |           |   |           |           |           |
|---|----------|-----------|-----------|---|-----------|-----------|-----------|
| C | 3.925244 | 0.513001  | -0.488006 | H | 1.409189  | 3.878401  | 0.482119  |
| O | 5.039285 | 0.384215  | -0.066554 | H | 0.816295  | 5.180581  | 2.501711  |
| O | 3.668671 | 1.271296  | -1.569625 | H | -2.041917 | 2.169143  | 3.594512  |
| H | 2.729543 | 1.228483  | -1.791635 | H | -0.914083 | 4.330119  | 4.064974  |
| H | 2.351028 | -2.169955 | 0.921726  | H | -2.128741 | -1.603275 | -1.487646 |
| H | 0.797938 | -0.866366 | -2.325601 | H | 1.293183  | -3.029066 | -2.360592 |
| C | 2.319537 | -2.065300 | -1.258073 | C | -0.861875 | -3.293321 | -1.942893 |
| H | 3.009681 | -1.789028 | -2.062837 | H | -1.387968 | -3.475207 | -2.880204 |
| H | 2.074143 | -3.122142 | -1.369952 | H | -0.604238 | -4.259788 | -1.495671 |

---

**TS1- $\beta$ 3-RS** E = -1031.59995960 (1)

|   |           |           |           |
|---|-----------|-----------|-----------|
| C | -0.753775 | 0.650208  | -1.921338 |
| H | -1.220788 | 1.174580  | -1.083598 |
| C | -2.224846 | -1.171881 | -2.439747 |
| H | -2.711619 | -1.794344 | -3.190782 |
| C | -0.901176 | -1.780545 | -1.956246 |
| H | -1.057865 | -2.496204 | -1.137370 |
| N | -0.169712 | -0.620227 | -1.456195 |
| C | 0.963013  | -0.730470 | -0.780590 |
| C | 1.517926  | 0.331686  | -0.049667 |
| H | 1.247423  | 1.331196  | -0.386233 |
| C | 2.928356  | 0.185112  | 0.467616  |
| H | 3.101627  | -0.835951 | 0.821878  |
| H | 3.104768  | 0.870306  | 1.301570  |
| C | 0.370476  | 0.306173  | 1.577528  |
| H | 0.960085  | -0.481072 | 2.043685  |
| C | -0.964183 | -0.057563 | 1.307917  |
| H | -1.805838 | 0.616151  | 1.259512  |
| N | -1.243637 | -1.365402 | 1.016165  |
| O | -2.402962 | -1.704238 | 0.701195  |
| O | -0.299058 | -2.194006 | 1.023695  |
| C | 0.606323  | 1.669627  | 2.130671  |
| C | 1.045234  | 4.218137  | 3.215900  |
| C | -0.003748 | 2.798655  | 1.572275  |

---

**TS1- $\beta$ 3-SR** E = -1031.60020372 (1)

|   |           |           |           |
|---|-----------|-----------|-----------|
| C | -1.866918 | 2.131580  | -1.697422 |
| H | -2.418115 | 2.381735  | -0.783525 |
| C | -2.211642 | -0.204809 | -2.181427 |
| H | -2.382246 | -0.977916 | -2.932644 |
| C | -0.715403 | 0.003948  | -1.894655 |
| H | -0.310735 | -0.749366 | -1.219606 |
| N | -0.689443 | 1.334476  | -1.303780 |
| C | 0.278174  | 1.817278  | -0.544953 |
| C | 1.275582  | 1.033042  | 0.056320  |
| H | 1.535109  | 0.108306  | -0.455977 |
| C | 2.437141  | 1.744594  | 0.707519  |
| H | 3.188448  | 2.051257  | -0.025919 |
| H | 2.930218  | 1.091163  | 1.432493  |
| C | 0.261303  | 0.207428  | 1.572721  |
| H | 0.390592  | 1.088072  | 2.198672  |
| C | -1.078174 | -0.072749 | 1.242522  |
| H | -1.484097 | -1.047612 | 1.017868  |
| N | -1.965167 | 0.968652  | 1.138510  |
| O | -3.139527 | 0.753683  | 0.772779  |
| O | -1.552500 | 2.129853  | 1.368254  |
| C | 1.138741  | -0.942343 | 1.930142  |
| C | 2.791872  | -3.092344 | 2.649749  |
| C | 1.138263  | -2.126248 | 1.183368  |

|   |           |           |           |   |           |           |           |
|---|-----------|-----------|-----------|---|-----------|-----------|-----------|
| C | 1.448573  | 1.839926  | 3.232749  | C | 1.987396  | -0.851669 | 3.037172  |
| C | 1.664639  | 3.104621  | 3.774168  | C | 2.806293  | -1.918931 | 3.396770  |
| C | 0.209426  | 4.061326  | 2.111209  | C | 1.953812  | -3.192925 | 1.540400  |
| H | -0.647123 | 2.682530  | 0.702843  | H | 0.491152  | -2.214027 | 0.313543  |
| H | 1.925408  | 0.969383  | 3.674776  | H | 1.992427  | 0.060925  | 3.626916  |
| H | 2.316991  | 3.217793  | 4.633953  | H | 3.454210  | -1.832020 | 4.262920  |
| H | -0.272837 | 4.926341  | 1.667416  | H | 1.938891  | -4.103909 | 0.950865  |
| H | 1.214052  | 5.204406  | 3.635339  | H | 3.430587  | -3.924344 | 2.927109  |
| H | 1.363157  | -1.733949 | -0.686966 | H | 0.166554  | 2.861488  | -0.268796 |
| H | 3.669250  | 0.405535  | -0.306006 | H | 2.091852  | 2.639312  | 1.235260  |
| C | -0.118350 | -2.462504 | -3.067715 | C | 0.083269  | 0.004011  | -3.191566 |
| O | 0.989684  | -2.164051 | -3.433607 | O | 0.428408  | 0.983734  | -3.798632 |
| O | -0.824615 | -3.472352 | -3.599127 | O | 0.316147  | -1.252461 | -3.607164 |
| H | -0.266230 | -3.882578 | -4.277308 | H | 0.782515  | -1.190008 | -4.455176 |
| H | -2.876292 | -1.078358 | -1.566855 | H | -2.704146 | -0.477448 | -1.243995 |
| H | 0.034903  | 1.281201  | -2.341717 | H | -1.540352 | 3.045084  | -2.199675 |
| C | -1.789398 | 0.202704  | -2.956140 | C | -2.662114 | 1.196309  | -2.613543 |
| H | -1.314315 | 0.109427  | -3.938303 | H | -2.401482 | 1.376136  | -3.660471 |
| H | -2.615177 | 0.910529  | -3.041460 | H | -3.736102 | 1.337256  | -2.489549 |

---

**TS2-*a1*-RS** E = -1110.19473893 (1)

|   |           |          |           |
|---|-----------|----------|-----------|
| C | -2.048940 | 1.080824 | -1.047833 |
| H | -2.455062 | 1.294836 | -0.056072 |
| C | -2.820799 | 1.787263 | -2.177543 |
| H | -3.643246 | 1.176085 | -2.553683 |
| C | -0.515755 | 2.426391 | -2.404944 |
| N | -0.704719 | 1.668381 | -1.153307 |
| C | 0.145412  | 1.799106 | -0.134993 |
| H | 0.940471  | 2.519517 | -0.301906 |
| C | 0.149106  | 0.994157 | 1.005687  |
| H | -0.746455 | 0.392347 | 1.172692  |
| C | 0.849473  | 1.466723 | 2.267780  |
| H | 1.184473  | 0.572213 | 2.806962  |
| C | 2.072953  | 2.343310 | 1.992678  |

---

**TS2-*a1*-SR** E = -1110.18782243 (1)

|   |           |           |           |
|---|-----------|-----------|-----------|
| C | 2.889577  | 0.594065  | -0.675891 |
| H | 3.373449  | 0.745304  | -1.650227 |
| C | 0.845491  | 1.844222  | -0.981230 |
| H | 0.493335  | 2.032776  | -2.002648 |
| H | -0.011531 | 1.908052  | -0.309719 |
| N | 1.433393  | 0.496981  | -0.902170 |
| C | 0.804084  | -0.614193 | -1.274160 |
| H | 1.426918  | -1.502883 | -1.308205 |
| C | -0.574423 | -0.681713 | -1.474711 |
| H | -1.081123 | 0.253917  | -1.707063 |
| C | -1.199937 | -1.920427 | -2.085126 |
| H | -2.207418 | -2.014294 | -1.656032 |
| C | 2.991438  | 1.870113  | 0.150698  |

|   |           |           |           |   |           |           |           |
|---|-----------|-----------|-----------|---|-----------|-----------|-----------|
| H | 2.634427  | 2.503827  | 2.916389  | H | 4.006369  | 2.270140  | 0.164253  |
| H | 1.776187  | 3.328991  | 1.617823  | C | 3.546258  | -0.701215 | -0.147432 |
| H | 2.750348  | 1.896258  | 1.257467  | O | 3.901308  | -1.523942 | -0.956940 |
| C | -0.143420 | 2.200640  | 3.177507  | O | 3.799277  | -0.804853 | 1.143787  |
| H | 0.335378  | 2.492732  | 4.117092  | H | 3.073472  | -0.418325 | 1.708864  |
| H | -1.003174 | 1.568540  | 3.416189  | C | -1.297058 | -0.690757 | 0.540029  |
| H | -0.513391 | 3.107442  | 2.686894  | H | -1.188354 | -1.771816 | 0.530853  |
| C | 1.286186  | -0.622814 | 0.330758  | C | -0.420812 | -0.011040 | 1.387078  |
| H | 2.210016  | -0.054170 | 0.387373  | H | -0.572127 | 0.965556  | 1.820357  |
| C | 0.857777  | -0.954776 | -0.962306 | N | 0.790210  | -0.585203 | 1.653412  |
| H | 0.195199  | -1.771357 | -1.202507 | O | 1.624065  | 0.042380  | 2.374086  |
| N | 1.188640  | -0.129060 | -1.994764 | O | 1.067905  | -1.688448 | 1.154767  |
| O | 0.619968  | -0.283251 | -3.127966 | C | -2.674706 | -0.181462 | 0.352805  |
| O | 1.997051  | 0.798731  | -1.818629 | C | -5.308500 | 0.725968  | 0.032845  |
| C | 1.072902  | -1.605223 | 1.419782  | C | -2.950893 | 1.187637  | 0.247426  |
| C | 0.755444  | -3.485130 | 3.466198  | C | -3.739323 | -1.086737 | 0.288333  |
| C | -0.119227 | -2.332646 | 1.530902  | C | -5.047351 | -0.636742 | 0.132303  |
| C | 2.093714  | -1.820467 | 2.352132  | C | -4.255310 | 1.637953  | 0.091484  |
| C | 1.939032  | -2.759538 | 3.367100  | H | -2.135899 | 1.905997  | 0.282466  |
| C | -0.271468 | -3.266648 | 2.548952  | H | -3.537099 | -2.150344 | 0.379670  |
| H | -0.934761 | -2.157190 | 0.832886  | H | -5.861514 | -1.352648 | 0.090677  |
| H | 3.017680  | -1.253641 | 2.269511  | H | -4.452672 | 2.701920  | 0.011348  |
| H | 2.741805  | -2.923112 | 4.078537  | H | -6.326948 | 1.078543  | -0.091584 |
| H | -1.199089 | -3.823814 | 2.628003  | H | 2.667362  | 1.673425  | 1.175889  |
| H | 0.630411  | -4.215743 | 4.258749  | C | 1.990068  | 2.785812  | -0.565372 |
| C | -2.120790 | -0.445377 | -1.203538 | H | 2.452009  | 3.223718  | -1.454652 |
| O | -2.626123 | -1.104783 | -0.323894 | H | 1.635502  | 3.602565  | 0.064857  |
| O | -1.738532 | -0.975463 | -2.357194 | C | -0.422936 | -3.200146 | -1.765678 |
| H | -0.879079 | -0.604309 | -2.751364 | H | 0.512090  | -3.242966 | -2.334336 |
| H | 0.424430  | 2.112453  | -2.866971 | H | -0.165989 | -3.274609 | -0.703891 |
| H | -3.235100 | 2.722864  | -1.790342 | H | -1.011565 | -4.077954 | -2.043679 |
| H | -0.471954 | 3.496385  | -2.170443 | C | -1.370015 | -1.751762 | -3.599554 |
| C | -1.747960 | 2.074173  | -3.233682 | H | -1.874221 | -2.621222 | -4.032211 |
| H | -2.031216 | 2.882472  | -3.909590 | H | -1.961741 | -0.862866 | -3.836934 |

|                                         |           |           |           |                                         |           |           |           |
|-----------------------------------------|-----------|-----------|-----------|-----------------------------------------|-----------|-----------|-----------|
| H                                       | -1.548052 | 1.182873  | -3.832559 | H                                       | -0.392876 | -1.649491 | -4.082890 |
| <hr/>                                   |           |           |           | <hr/>                                   |           |           |           |
| <b>TS2-β1-RS</b> E = -1110.19506826 (1) |           |           |           | <b>TS2-β1-SR</b> E = -1110.18152497 (1) |           |           |           |
| C                                       | -2.374539 | -1.805514 | -0.300636 | C                                       | 2.621448  | 3.089187  | -1.117778 |
| H                                       | -2.984548 | -0.894621 | -0.186060 | H                                       | 3.620697  | 3.539730  | -1.101639 |
| C                                       | -2.731598 | -2.511436 | -1.599073 | C                                       | 3.176013  | 0.951150  | -1.995295 |
| H                                       | -3.810793 | -2.573265 | -1.744233 | H                                       | 2.886997  | 0.089553  | -2.597867 |
| C                                       | -0.689340 | -1.296491 | -1.974157 | C                                       | 2.844727  | 0.740231  | -0.507390 |
| H                                       | 0.087143  | -2.032346 | -2.216418 | H                                       | 1.974544  | 0.097825  | -0.358674 |
| H                                       | -0.319554 | -0.301952 | -2.232489 | N                                       | 2.521254  | 2.100229  | -0.036165 |
| N                                       | -0.977243 | -1.385972 | -0.531728 | C                                       | 2.266585  | 2.412211  | 1.223067  |
| C                                       | -0.055164 | -1.254897 | 0.412449  | C                                       | 2.082054  | 1.487779  | 2.262330  |
| H                                       | -0.358676 | -1.539047 | 1.412935  | H                                       | 2.495491  | 0.503105  | 2.066094  |
| C                                       | 1.167640  | -0.611335 | 0.211339  | C                                       | 2.247882  | 1.929125  | 3.707774  |
| H                                       | 1.520411  | -0.537111 | -0.816477 | H                                       | 1.494482  | 1.384331  | 4.295380  |
| C                                       | 2.266919  | -0.722741 | 1.251485  | C                                       | 0.220575  | 0.863186  | 2.005722  |
| H                                       | 2.830752  | 0.219435  | 1.222033  | H                                       | 0.294799  | 0.771348  | 0.923814  |
| C                                       | 1.731530  | -0.915430 | 2.672572  | C                                       | 0.147004  | -0.369820 | 2.687752  |
| H                                       | 2.538264  | -0.789194 | 3.398704  | H                                       | -0.243312 | -0.525884 | 3.680223  |
| H                                       | 1.328125  | -1.924915 | 2.806713  | N                                       | 0.778334  | -1.465798 | 2.166391  |
| H                                       | 0.934968  | -0.204799 | 2.917961  | O                                       | 0.825389  | -2.522121 | 2.791794  |
| C                                       | 3.241955  | -1.847642 | 0.884930  | O                                       | 1.318694  | -1.361055 | 1.011098  |
| H                                       | 4.064882  | -1.896488 | 1.604311  | C                                       | 4.071435  | 0.191142  | 0.253862  |
| H                                       | 3.669825  | -1.694122 | -0.109951 | O                                       | 5.095151  | 0.827163  | 0.277951  |
| H                                       | 2.727875  | -2.814423 | 0.889334  | O                                       | 3.938686  | -0.994011 | 0.824242  |
| C                                       | 0.517821  | 1.366295  | 0.326292  | H                                       | 2.991299  | -1.299820 | 0.861196  |
| H                                       | 0.560278  | 1.335441  | 1.411670  | C                                       | -0.628287 | 1.999931  | 2.450419  |
| C                                       | -0.764936 | 1.528769  | -0.215802 | C                                       | -2.112646 | 4.249726  | 3.230251  |
| H                                       | -0.991227 | 1.963127  | -1.177849 | C                                       | -0.903563 | 3.029112  | 1.541582  |
| N                                       | -1.855994 | 1.085493  | 0.475751  | C                                       | -1.124616 | 2.108570  | 3.752750  |
| O                                       | -2.993943 | 1.187080  | -0.011179 | C                                       | -1.858913 | 3.227054  | 4.138860  |
| O                                       | -1.671650 | 0.527453  | 1.599740  | C                                       | -1.637372 | 4.144774  | 1.923423  |
| C                                       | 1.648217  | 2.069297  | -0.332328 | H                                       | -0.529648 | 2.944086  | 0.522608  |
| C                                       | 3.777279  | 3.443490  | -1.531983 | H                                       | -0.934124 | 1.322969  | 4.476280  |



|   |           |           |           |   |           |          |           |
|---|-----------|-----------|-----------|---|-----------|----------|-----------|
| C | 1.782840  | 2.101260  | -1.725484 | H | -2.233175 | 3.297747 | 5.154849  |
| C | 2.602568  | 2.728105  | 0.448879  | H | -1.843644 | 4.930633 | 1.203973  |
| C | 3.658388  | 3.413200  | -0.146325 | H | -2.683931 | 5.120531 | 3.534156  |
| C | 2.835421  | 2.784389  | -2.320983 | C | 2.043381  | 3.428162 | 3.937664  |
| H | 1.058011  | 1.580737  | -2.346961 | H | 2.864961  | 4.004908 | 3.497007  |
| H | 2.504332  | 2.713053  | 1.530998  | H | 2.038344  | 3.639781 | 5.010048  |
| H | 4.386721  | 3.924109  | 0.474750  | H | 1.869880  | 3.870276 | -0.981647 |
| H | 2.925387  | 2.800182  | -3.402234 | H | 1.097700  | 3.791925 | 3.522828  |
| H | 4.600782  | 3.974691  | -1.997432 | H | 2.079906  | 3.470543 | 1.398696  |
| C | -2.527669 | -2.660231 | 0.961272  | C | 3.629133  | 1.490549 | 4.209848  |
| O | -2.583477 | -3.861258 | 0.923408  | H | 4.419765  | 1.972736 | 3.625176  |
| O | -2.595317 | -1.973549 | 2.099613  | H | 3.757355  | 0.408828 | 4.112443  |
| H | -2.501075 | -1.001801 | 1.946456  | H | 3.764127  | 1.759790 | 5.261801  |
| H | -2.322161 | -3.525568 | -1.576674 | H | 4.253993  | 1.108161 | -2.092813 |
| C | -2.030582 | -1.628425 | -2.635974 | C | 2.427408  | 2.235677 | -2.365908 |
| H | -2.603468 | -0.707708 | -2.782174 | H | 2.823313  | 2.714346 | -3.262801 |
| H | -1.898684 | -2.112878 | -3.604405 | H | 1.362719  | 2.033614 | -2.518500 |

---

**TS2-β2-RS** E = -1110.18026554 (1)

|   |           |           |           |
|---|-----------|-----------|-----------|
| C | 1.100303  | -0.454109 | -1.658029 |
| H | 0.227663  | -1.083517 | -1.477139 |
| C | 2.930798  | -1.603615 | -0.617372 |
| H | 3.976912  | -1.908756 | -0.641228 |
| C | 2.763506  | -0.273155 | 0.125359  |
| H | 2.666629  | -0.413590 | 1.209214  |
| N | 1.488332  | 0.233106  | -0.405904 |
| C | 0.790862  | 1.191188  | 0.194196  |
| C | -0.570971 | 1.433219  | -0.088954 |
| H | -0.882156 | 1.141036  | -1.093199 |
| C | -1.189146 | 2.744520  | 0.381252  |
| H | -2.261842 | 2.553011  | 0.515478  |
| C | -1.476749 | 0.043601  | 0.874983  |
| H | -1.520925 | 0.615318  | 1.801199  |
| C | -0.723658 | -1.152360 | 0.991630  |

---

**TS2-β2-SR** E = -1110.18386010 (1)

|   |           |           |           |
|---|-----------|-----------|-----------|
| C | -1.696732 | 0.902794  | -0.416392 |
| H | -0.654358 | 1.003608  | -0.724369 |
| C | -2.610284 | 0.468891  | -1.560418 |
| H | -2.902474 | 1.322671  | -2.170650 |
| C | -3.093148 | -0.949931 | 0.319935  |
| H | -2.811249 | -1.965850 | 0.018118  |
| N | -1.839053 | -0.196764 | 0.549302  |
| C | -0.957550 | -0.559991 | 1.468329  |
| H | -1.283191 | -1.365278 | 2.116754  |
| C | 0.371705  | -0.078843 | 1.517666  |
| H | 0.519561  | 0.918098  | 1.098578  |
| C | 1.171552  | -0.308069 | 2.794357  |
| H | 2.229862  | -0.297820 | 2.503706  |
| C | -2.129400 | 2.262315  | 0.171146  |
| O | -2.584896 | 3.130794  | -0.518707 |

|   |           |           |           |   |           |           |           |
|---|-----------|-----------|-----------|---|-----------|-----------|-----------|
| H | -0.914292 | -2.073837 | 0.462927  | O | -1.913738 | 2.456233  | 1.482212  |
| N | 0.371359  | -1.150706 | 1.804420  | H | -1.579735 | 1.652552  | 1.904428  |
| O | 1.098585  | -2.159599 | 1.898102  | C | 1.274283  | -1.072760 | 0.120582  |
| O | 0.654835  | -0.078511 | 2.406560  | H | 1.484141  | -1.922274 | 0.768440  |
| C | -2.792353 | -0.066512 | 0.174893  | C | 0.423570  | -1.387687 | -0.965597 |
| C | -5.284050 | -0.285719 | -1.092882 | H | 0.443671  | -0.922674 | -1.939771 |
| C | -2.908228 | -0.698326 | -1.067800 | N | -0.557602 | -2.318128 | -0.775611 |
| C | -3.942428 | 0.461839  | 0.767084  | O | -0.646026 | -2.862059 | 0.356916  |
| C | -5.180645 | 0.351002  | 0.139713  | O | -1.376507 | -2.570238 | -1.683834 |
| C | -4.142666 | -0.811103 | -1.696092 | C | 2.472294  | -0.234260 | -0.182071 |
| H | -2.020483 | -1.104142 | -1.547757 | C | 4.751869  | 1.301275  | -0.741686 |
| H | -3.864494 | 0.950097  | 1.734796  | C | 2.381237  | 0.920383  | -0.967161 |
| H | -6.064384 | 0.761699  | 0.616936  | C | 3.722622  | -0.602834 | 0.322213  |
| H | -4.215448 | -1.306752 | -2.658718 | C | 4.855478  | 0.157013  | 0.042715  |
| H | -6.247778 | -0.371460 | -1.583713 | C | 3.509877  | 1.681199  | -1.247344 |
| H | 1.291012  | 1.680848  | 1.022530  | H | 1.418184  | 1.226541  | -1.369481 |
| C | 3.960627  | 0.648908  | -0.146627 | H | 3.806317  | -1.501916 | 0.927032  |
| O | 5.070547  | 0.324616  | 0.167094  | H | 5.818996  | -0.147696 | 0.437911  |
| O | 3.721487  | 1.821063  | -0.762668 | H | 3.420618  | 2.572975  | -1.858981 |
| H | 2.783245  | 1.900383  | -0.978815 | H | 5.632825  | 1.896263  | -0.958263 |
| H | 2.338508  | -2.356883 | -0.091393 | H | -2.092666 | -0.281887 | -2.163527 |
| H | 0.847687  | 0.288746  | -2.422021 | H | -3.677453 | -0.987946 | 1.242819  |
| C | 2.339259  | -1.288520 | -1.994813 | C | -3.778990 | -0.185685 | -0.814215 |
| H | 3.044182  | -0.693412 | -2.585725 | H | -4.357325 | -0.856055 | -1.450249 |
| H | 2.083120  | -2.179398 | -2.569636 | H | -4.449102 | 0.584240  | -0.417955 |
| C | -1.046626 | 3.829819  | -0.689534 | C | 0.955378  | 0.841265  | 3.783800  |
| H | -1.530890 | 4.756962  | -0.369357 | H | 1.580729  | 0.714881  | 4.672494  |
| H | 0.010844  | 4.050063  | -0.874512 | H | 1.197347  | 1.808757  | 3.333860  |
| H | -1.500211 | 3.519526  | -1.635396 | H | -0.089744 | 0.870627  | 4.115270  |
| C | -0.615731 | 3.221334  | 1.719021  | C | 0.866954  | -1.657058 | 3.452674  |
| H | -1.243825 | 4.010390  | 2.139317  | H | 0.824532  | -2.474594 | 2.725642  |
| H | -0.538618 | 2.410562  | 2.450912  | H | 1.629402  | -1.894193 | 4.198490  |
| H | 0.386334  | 3.644306  | 1.585543  | H | -0.095684 | -1.628645 | 3.975357  |

---

| <b>TS2-β3-RS</b> E = -1110.19193505 (1) |           |           |           | <b>TS2-β3-SR</b> E = -1110.19204406 (1) |           |           |           |
|-----------------------------------------|-----------|-----------|-----------|-----------------------------------------|-----------|-----------|-----------|
| C                                       | -2.336658 | -1.717113 | 0.069581  | C                                       | -1.047979 | -1.318155 | -1.377145 |
| H                                       | -2.776680 | -1.007311 | 0.783810  | H                                       | -1.442520 | -0.571079 | -0.689529 |
| C                                       | -3.025890 | -1.643160 | -1.299509 | C                                       | -1.455198 | -1.051034 | -2.835586 |
| H                                       | -3.914384 | -2.273099 | -1.345991 | H                                       | -2.472402 | -1.385123 | -3.047016 |
| C                                       | -0.671838 | -1.378208 | -1.674697 | H                                       | -1.366494 | 0.022585  | -3.023515 |
| H                                       | 0.254755  | -1.937398 | -1.835016 | C                                       | -0.373631 | -1.803257 | -3.621318 |
| N                                       | -0.965182 | -1.318208 | -0.232275 | H                                       | -0.270362 | -1.427432 | -4.639576 |
| C                                       | -0.075992 | -1.075485 | 0.717862  | H                                       | -0.604121 | -2.871796 | -3.662001 |
| H                                       | -0.412821 | -1.270548 | 1.728208  | C                                       | 0.899324  | -1.562627 | -2.804390 |
| C                                       | 1.138057  | -0.412720 | 0.470794  | H                                       | 1.563498  | -2.429717 | -2.782827 |
| H                                       | 1.525936  | -0.511536 | -0.543504 | H                                       | 1.447575  | -0.677080 | -3.147043 |
| C                                       | 2.212697  | -0.402799 | 1.546370  | N                                       | 0.405446  | -1.281785 | -1.443044 |
| H                                       | 2.786686  | 0.524024  | 1.410877  | C                                       | 1.218206  | -1.076335 | -0.421694 |
| C                                       | 1.630856  | -0.401531 | 2.962871  | H                                       | 2.271219  | -1.178493 | -0.658661 |
| H                                       | 2.409034  | -0.159826 | 3.691146  | C                                       | 0.808310  | -0.559573 | 0.819435  |
| H                                       | 1.238890  | -1.391131 | 3.222350  | H                                       | -0.220601 | -0.777938 | 1.106315  |
| H                                       | 0.813787  | 0.319222  | 3.074213  | C                                       | 1.783498  | -0.585706 | 1.986336  |
| C                                       | 3.181009  | -1.574988 | 1.359228  | H                                       | 1.517387  | 0.257190  | 2.638076  |
| H                                       | 3.978675  | -1.543336 | 2.107741  | C                                       | 1.617318  | -1.868807 | 2.806771  |
| H                                       | 3.644580  | -1.552831 | 0.368573  | H                                       | 2.291415  | -1.869460 | 3.668868  |
| H                                       | 2.650807  | -2.527300 | 1.465674  | H                                       | 1.846253  | -2.746590 | 2.193204  |
| C                                       | 0.538191  | 1.471761  | 0.295594  | H                                       | 0.593227  | -1.973238 | 3.176789  |
| H                                       | 0.591605  | 1.641830  | 1.369132  | C                                       | 3.239852  | -0.406075 | 1.548097  |
| C                                       | -0.759121 | 1.591778  | -0.243497 | H                                       | 3.870533  | -0.185301 | 2.412822  |
| H                                       | -0.998603 | 1.900948  | -1.249408 | H                                       | 3.355931  | 0.401113  | 0.817015  |
| N                                       | -1.828651 | 1.229631  | 0.528244  | H                                       | 3.626352  | -1.324608 | 1.092720  |
| O                                       | -2.983650 | 1.254383  | 0.054490  | C                                       | 0.524349  | 1.372840  | 0.397655  |
| O                                       | -1.609707 | 0.821475  | 1.697257  | H                                       | 1.574627  | 1.607685  | 0.556938  |
| C                                       | 1.652288  | 2.088744  | -0.479452 | C                                       | 0.080597  | 1.579345  | -0.922642 |
| C                                       | 3.740038  | 3.296141  | -1.912134 | H                                       | -0.925194 | 1.837983  | -1.217929 |
| C                                       | 1.788243  | 1.880366  | -1.856555 | N                                       | 0.963041  | 1.389854  | -1.954073 |
| C                                       | 2.585579  | 2.902367  | 0.168884  | O                                       | 0.573672  | 1.491403  | -3.136367 |
| C                                       | 3.620617  | 3.504500  | -0.541883 | O                                       | 2.142133  | 1.062211  | -1.677340 |

|   |           |           |           |   |           |           |           |
|---|-----------|-----------|-----------|---|-----------|-----------|-----------|
| C | 2.819470  | 2.480701  | -2.568477 | C | -0.377062 | 1.812752  | 1.500033  |
| H | 1.079661  | 1.235873  | -2.371792 | C | -2.040383 | 2.682998  | 3.586626  |
| H | 2.487234  | 3.073728  | 1.237438  | C | -1.749554 | 1.538442  | 1.483254  |
| H | 4.332657  | 4.137840  | -0.022761 | C | 0.147152  | 2.524301  | 2.583312  |
| H | 2.909164  | 2.309702  | -3.636424 | C | -0.677236 | 2.958672  | 3.617936  |
| H | 4.547073  | 3.762937  | -2.467101 | C | -2.574829 | 1.970995  | 2.514121  |
| C | -2.362926 | -3.111448 | 0.676814  | H | -2.178813 | 0.982512  | 0.652936  |
| O | -1.397761 | -3.769332 | 0.970879  | H | 1.210088  | 2.749415  | 2.603890  |
| O | -3.625022 | -3.527810 | 0.863283  | H | -0.252293 | 3.514508  | 4.447424  |
| H | -3.576541 | -4.403312 | 1.277015  | H | -3.636902 | 1.750354  | 2.482843  |
| H | -3.310515 | -0.600136 | -1.462249 | H | -2.684282 | 3.018746  | 4.392745  |
| H | -0.551647 | -0.367960 | -2.073646 | C | -1.505848 | -2.701893 | -0.934772 |
| C | -1.908164 | -2.069328 | -2.256146 | O | -0.821472 | -3.691157 | -0.915660 |
| H | -2.092810 | -1.775918 | -3.290575 | O | -2.808773 | -2.688902 | -0.605660 |
| H | -1.773577 | -3.155650 | -2.226424 | H | -3.053583 | -3.598900 | -0.376606 |

---

**TS3- $\alpha$ 1-RS** E = -1110.19888369 (1)

|   |           |           |           |
|---|-----------|-----------|-----------|
| C | 3.169248  | 0.915424  | -0.128773 |
| H | 3.032599  | 1.327661  | 0.875596  |
| H | 3.615773  | 1.676758  | -0.779351 |
| C | 3.400088  | -1.164599 | -1.303089 |
| C | 1.895298  | -0.856271 | -1.229821 |
| H | 1.419495  | -0.848069 | -2.213245 |
| N | 1.857074  | 0.506636  | -0.668135 |
| C | 0.857270  | 1.377673  | -0.916943 |
| C | -0.424326 | 0.915802  | -1.238032 |
| H | -0.519943 | -0.145574 | -1.459889 |
| C | -1.447977 | 1.798022  | -1.908279 |
| H | -1.186764 | 1.996157  | -2.953261 |
| H | -2.422634 | 1.306294  | -1.903139 |
| C | -1.186711 | 0.685105  | 0.750751  |
| H | -1.167907 | 1.757549  | 0.928096  |
| C | -0.269512 | -0.074363 | 1.479670  |
| H | -0.340165 | -1.138235 | 1.642639  |

---

**TS3- $\alpha$ 1-SR** E = -1110.18848496 (1)

|   |          |          |           |
|---|----------|----------|-----------|
| C | 1.009258 | 0.821042 | 0.717529  |
| H | 1.489004 | 0.077967 | 1.366679  |
| H | 0.045528 | 1.077058 | 1.154520  |
| C | 1.388822 | 1.499096 | -1.571426 |
| H | 1.766550 | 1.204810 | -2.551911 |
| C | 2.496220 | 2.072025 | -0.685862 |
| H | 3.354141 | 1.388212 | -0.682799 |
| N | 1.861575 | 2.030349 | 0.650740  |
| C | 2.273497 | 2.655870 | 1.771215  |
| C | 1.633621 | 2.368410 | 2.989922  |
| H | 1.122872 | 1.414083 | 3.054923  |
| C | 3.429443 | 3.623346 | 1.708352  |
| H | 3.338826 | 4.293086 | 0.854423  |
| H | 3.374595 | 4.264546 | 2.588907  |
| C | 4.770253 | 2.877719 | 1.680461  |
| H | 5.591413 | 3.593697 | 1.753539  |
| H | 4.902327 | 2.332705 | 0.743207  |

|   |           |           |           |   |           |           |           |
|---|-----------|-----------|-----------|---|-----------|-----------|-----------|
| N | 0.880305  | 0.519847  | 1.924106  | H | 4.850609  | 2.174992  | 2.515417  |
| O | 1.825187  | -0.209414 | 2.366254  | C | 2.179818  | 2.876049  | 4.302413  |
| O | 1.014648  | 1.751197  | 1.863164  | H | 1.563603  | 2.504581  | 5.124221  |
| C | -2.510610 | 0.106095  | 0.432594  | H | 2.177374  | 3.970312  | 4.358048  |
| C | -5.043968 | -0.935910 | -0.130400 | H | 3.207600  | 2.542423  | 4.482980  |
| C | -2.651815 | -1.231266 | 0.039070  | C | -0.254114 | 3.405147  | 2.840085  |
| C | -3.648035 | 0.915295  | 0.524602  | H | 0.264963  | 4.291879  | 3.191421  |
| C | -4.909405 | 0.395916  | 0.251495  | C | -0.676001 | 3.452613  | 1.513033  |
| C | -3.913261 | -1.744385 | -0.238759 | H | -1.447886 | 2.855982  | 1.052740  |
| H | -1.773818 | -1.863401 | -0.073721 | N | 0.047506  | 4.230962  | 0.651137  |
| H | -3.538984 | 1.955182  | 0.820725  | O | -0.209184 | 4.186689  | -0.588109 |
| H | -5.784877 | 1.031571  | 0.334642  | O | 0.975967  | 4.925676  | 1.087997  |
| H | -4.012629 | -2.779880 | -0.547066 | C | 3.073472  | 3.388302  | -1.237067 |
| H | -6.026084 | -1.342298 | -0.349123 | O | 4.248217  | 3.421701  | -1.518458 |
| H | 3.790535  | -0.790927 | -2.254496 | O | 2.265488  | 4.397698  | -1.485735 |
| C | 1.152260  | -1.939019 | -0.430868 | H | 1.323011  | 4.311612  | -1.167470 |
| O | 0.262712  | -2.563096 | -0.963149 | H | 0.604194  | 2.251308  | -1.694922 |
| O | 1.597638  | -2.244830 | 0.781785  | C | 0.884553  | 0.325162  | -0.731752 |
| H | 1.842631  | -1.456715 | 1.364424  | H | 1.523771  | -0.548280 | -0.885409 |
| H | -1.562562 | 2.764237  | -1.406353 | H | -0.139433 | 0.038893  | -0.976436 |
| H | 3.602131  | -2.235708 | -1.244464 | C | -1.048195 | 2.678468  | 3.854670  |
| C | 3.990350  | -0.371069 | -0.135765 | C | -2.547964 | 1.359857  | 5.822944  |
| H | 5.056143  | -0.171439 | -0.258293 | C | -1.748410 | 1.503835  | 3.551472  |
| H | 3.851187  | -0.904881 | 0.806759  | C | -1.106390 | 3.175393  | 5.161413  |
| C | 1.160437  | 2.853348  | -0.831673 | C | -1.852955 | 2.523487  | 6.138125  |
| H | 1.912673  | 3.043311  | -0.067085 | C | -2.493155 | 0.851610  | 4.525903  |
| H | 0.260639  | 3.380157  | -0.505765 | H | -1.709822 | 1.094878  | 2.545262  |
| C | 1.622983  | 3.385100  | -2.194946 | H | -0.568388 | 4.087325  | 5.405097  |
| H | 1.859391  | 4.449549  | -2.130479 | H | -1.892554 | 2.926690  | 7.144636  |
| H | 2.519338  | 2.859119  | -2.537854 | H | -3.031182 | -0.056635 | 4.274954  |
| H | 0.849645  | 3.253644  | -2.955799 | H | -3.129196 | 0.848866  | 6.583267  |

---

**TS3- $\beta$ 1-RS** E = -1110.19118181 (1)

C 2.610368 -0.703527 -0.217401

---

**TS3- $\beta$ 1-SR** E = -1110.18722312 (1)

C -3.202846 -1.562799 -0.903748

|   |           |           |           |   |           |           |           |
|---|-----------|-----------|-----------|---|-----------|-----------|-----------|
| H | 2.354540  | -1.480247 | 0.519275  | H | -3.712612 | -1.132622 | -1.766580 |
| C | 3.258021  | -1.373592 | -1.422458 | H | -3.946894 | -1.832721 | -0.148668 |
| H | 4.064447  | -2.046736 | -1.126978 | C | -2.339822 | -2.777027 | -1.241247 |
| C | 0.901368  | -1.111689 | -1.855148 | H | -1.762101 | -2.596886 | -2.153489 |
| H | -0.023724 | -1.623613 | -1.578456 | H | -2.919405 | -3.692068 | -1.373466 |
| N | 1.342554  | -0.194795 | -0.779229 | C | -1.398552 | -2.857778 | -0.044024 |
| C | 0.633620  | 0.905481  | -0.467151 | H | -0.464934 | -3.369326 | -0.282362 |
| C | -0.714308 | 0.979800  | -0.845800 | H | -1.874422 | -3.362964 | 0.805800  |
| H | -1.068994 | 0.250035  | -1.564155 | C | -2.206761 | -0.572594 | -0.278971 |
| C | -1.487711 | 2.276908  | -0.841146 | H | -1.774511 | 0.100496  | -1.022598 |
| H | -1.617631 | 2.683809  | 0.168345  | N | -1.153594 | -1.444007 | 0.281243  |
| H | -1.003058 | 3.050743  | -1.445281 | C | -0.172822 | -0.986876 | 1.072650  |
| H | -2.486596 | 2.110524  | -1.248450 | C | 0.081779  | 0.390810  | 1.180374  |
| C | 3.560294  | 0.285954  | 0.467584  | H | -0.719740 | 1.048330  | 0.868823  |
| O | 4.373483  | 0.927377  | -0.147569 | C | 0.920915  | 0.972782  | 2.285103  |
| O | 3.487671  | 0.312371  | 1.796329  | H | 1.254850  | 1.971658  | 1.982591  |
| H | 2.655293  | -0.117527 | 2.103791  | H | 1.807616  | 0.377792  | 2.517284  |
| C | -0.849234 | -1.291116 | 1.043385  | H | 0.336494  | 1.092471  | 3.202719  |
| H | -1.178873 | -2.260557 | 0.702093  | C | -2.902785 | 0.228510  | 0.838226  |
| C | -1.519518 | -0.086818 | 0.837398  | O | -3.328938 | -0.330703 | 1.815915  |
| H | -1.253456 | 0.723175  | 1.512122  | O | -3.050678 | 1.531361  | 0.631139  |
| N | 0.356341  | -1.308925 | 1.696336  | H | -2.485403 | 1.865418  | -0.105076 |
| O | 0.841461  | -0.224638 | 2.125871  | C | 1.104201  | 2.135346  | -0.690954 |
| O | 0.972183  | -2.377768 | 1.824834  | H | 1.941993  | 2.778263  | -0.472977 |
| C | -2.931952 | -0.117339 | 0.389736  | C | 1.075046  | 0.739586  | -0.562395 |
| C | -5.615202 | -0.146335 | -0.416232 | H | 0.320539  | 0.237130  | -1.163480 |
| C | -3.853848 | 0.770045  | 0.952611  | N | -0.061035 | 2.808220  | -0.980968 |
| C | -3.371538 | -1.014146 | -0.591532 | O | -1.111876 | 2.127943  | -1.211337 |
| C | -4.702046 | -1.030590 | -0.989679 | O | -0.075560 | 4.035143  | -1.017170 |
| C | -5.187752 | 0.753349  | 0.555298  | C | 2.335071  | -0.027991 | -0.421970 |
| H | -3.520922 | 1.470424  | 1.713431  | C | 4.646404  | -1.587998 | -0.119586 |
| H | -2.660244 | -1.694977 | -1.053303 | C | 2.392953  | -1.330442 | -0.933294 |
| H | -5.028449 | -1.730370 | -1.752052 | C | 3.456026  | 0.482770  | 0.241337  |
| H | -5.892373 | 1.444811  | 1.005524  | C | 4.601350  | -0.293528 | 0.392244  |

|   |           |           |           |   |           |           |           |
|---|-----------|-----------|-----------|---|-----------|-----------|-----------|
| H | -6.653799 | -0.157943 | -0.729568 | C | 3.538055  | -2.104831 | -0.787269 |
| H | 0.709319  | -0.512943 | -2.752608 | H | 1.524058  | -1.730811 | -1.452448 |
| H | 3.668465  | -0.599504 | -2.077017 | H | 3.428776  | 1.488062  | 0.650513  |
| C | 2.063912  | -2.094784 | -2.045439 | H | 5.462593  | 0.115687  | 0.910239  |
| H | 1.863061  | -3.015931 | -1.491408 | H | 3.568242  | -3.109407 | -1.196957 |
| H | 2.208888  | -2.351744 | -3.095870 | H | 5.541823  | -2.189332 | -0.002534 |
| C | 1.256937  | 2.078922  | 0.243972  | C | 0.680022  | -1.987643 | 1.802123  |
| H | 1.926204  | 1.773525  | 1.042442  | H | 0.789711  | -2.909067 | 1.226732  |
| H | 0.456367  | 2.639224  | 0.731868  | H | 1.686223  | -1.579029 | 1.920642  |
| C | 1.986465  | 2.978456  | -0.765699 | C | 0.053279  | -2.287592 | 3.173157  |
| H | 2.805806  | 2.435349  | -1.240701 | H | -0.976400 | -2.639226 | 3.065256  |
| H | 2.409507  | 3.846024  | -0.254909 | H | 0.631019  | -3.051217 | 3.698101  |
| H | 1.304910  | 3.336047  | -1.542726 | H | 0.028949  | -1.386460 | 3.790090  |

---

**TS3- $\beta$ 2-RS** E = -1110.18466800 (1)

|   |           |           |           |
|---|-----------|-----------|-----------|
| C | 1.112157  | -0.347835 | -1.649920 |
| H | 0.249071  | -0.993991 | -1.478762 |
| C | 2.932508  | -1.533061 | -0.659186 |
| H | 3.976750  | -1.846991 | -0.688280 |
| C | 2.760512  | -0.237863 | 0.153099  |
| H | 2.649468  | -0.448865 | 1.221394  |
| N | 1.505962  | 0.322467  | -0.384777 |
| C | 0.768965  | 1.265750  | 0.225921  |
| C | -0.594688 | 1.405313  | -0.139769 |
| H | -0.848388 | 1.015874  | -1.122630 |
| C | -1.364822 | 2.657267  | 0.215600  |
| H | -2.435566 | 2.478393  | 0.094170  |
| C | -1.452475 | -0.026230 | 0.889756  |
| H | -1.428195 | 0.529884  | 1.826808  |
| C | -0.716928 | -1.232158 | 0.920127  |
| H | -0.938051 | -2.116433 | 0.342326  |
| N | 0.385834  | -1.316816 | 1.723998  |
| O | 1.072908  | -2.355596 | 1.740199  |
| O | 0.705319  | -0.308427 | 2.402951  |

---

**TS3- $\beta$ 2-SR** E = -1110.18856632 (1)

|   |           |           |           |
|---|-----------|-----------|-----------|
| C | -1.645037 | 0.861819  | -0.305032 |
| H | -0.635922 | 0.934565  | -0.703928 |
| C | -2.655141 | 0.497545  | -1.398631 |
| H | -2.958004 | 1.380127  | -1.962646 |
| C | -3.030066 | -0.999428 | 0.432518  |
| H | -2.764007 | -1.987354 | 0.034939  |
| N | -1.771107 | -0.247616 | 0.654369  |
| C | -0.830873 | -0.610107 | 1.540697  |
| C | 0.467887  | -0.052487 | 1.469481  |
| H | 0.530305  | 0.913630  | 0.975075  |
| C | 1.417426  | -0.178684 | 2.641540  |
| H | 2.358123  | 0.321035  | 2.402654  |
| H | 1.651573  | -1.223613 | 2.869088  |
| H | 1.019066  | 0.281798  | 3.551047  |
| C | -1.979352 | 2.231223  | 0.311456  |
| O | -1.898073 | 3.233161  | -0.343260 |
| O | -2.381346 | 2.252644  | 1.591242  |
| H | -2.362372 | 1.354781  | 1.951935  |
| C | 1.319176  | -1.105770 | 0.020949  |

|   |           |           |           |   |           |           |           |
|---|-----------|-----------|-----------|---|-----------|-----------|-----------|
| C | -2.800147 | -0.100323 | 0.250865  | H | 1.488904  | -1.966580 | 0.665577  |
| C | -5.350449 | -0.270232 | -0.901403 | C | 0.448617  | -1.363042 | -1.058116 |
| C | -2.976381 | -0.679018 | -1.010412 | H | 0.450146  | -0.849924 | -2.008003 |
| C | -3.919108 | 0.401666  | 0.920605  | N | -0.545546 | -2.288627 | -0.892901 |
| C | -5.186404 | 0.314382  | 0.350717  | O | -0.617367 | -2.896582 | 0.204000  |
| C | -4.240288 | -0.766880 | -1.581828 | O | -1.385520 | -2.478434 | -1.795814 |
| H | -2.112459 | -1.062904 | -1.548956 | C | 2.537386  | -0.293622 | -0.260538 |
| H | -3.792161 | 0.854368  | 1.900151  | C | 4.854143  | 1.196545  | -0.779708 |
| H | -6.045638 | 0.703836  | 0.886897  | C | 2.473210  | 0.887234  | -1.008340 |
| H | -4.360295 | -1.220783 | -2.560197 | C | 3.777270  | -0.709771 | 0.232024  |
| H | -6.337159 | -0.336649 | -1.347507 | C | 4.929049  | 0.027378  | -0.028820 |
| C | 3.977162  | 0.667117  | -0.053033 | C | 3.621510  | 1.625587  | -1.268554 |
| O | 5.004757  | 0.491863  | 0.536343  | H | 1.515768  | 1.235094  | -1.390137 |
| O | 3.864791  | 1.628732  | -0.995456 | H | 3.836186  | -1.623861 | 0.816494  |
| H | 2.952424  | 1.657144  | -1.315553 | H | 5.884917  | -0.313021 | 0.355819  |
| H | 2.335948  | -2.309193 | -0.172571 | H | 3.554091  | 2.539183  | -1.849967 |
| H | 0.842410  | 0.406941  | -2.396465 | H | 5.750273  | 1.774012  | -0.981067 |
| C | 2.351994  | -1.160295 | -2.023530 | H | -2.199826 | -0.240842 | -2.064525 |
| H | 3.058576  | -0.541661 | -2.587289 | H | -3.578932 | -1.120202 | 1.369989  |
| H | 2.097687  | -2.026717 | -2.635552 | C | -3.782273 | -0.158125 | -0.597966 |
| H | -1.098844 | 3.495606  | -0.434854 | H | -4.434584 | -0.777134 | -1.214437 |
| H | -1.192181 | 2.965273  | 1.250724  | H | -4.393756 | 0.604606  | -0.102872 |
| C | 1.388617  | 2.121896  | 1.302713  | C | -1.219215 | -1.585178 | 2.620173  |
| H | 0.659138  | 2.208658  | 2.111480  | H | -1.867830 | -2.361476 | 2.215284  |
| H | 2.249660  | 1.618677  | 1.744250  | H | -0.319075 | -2.091284 | 2.971304  |
| C | 1.790419  | 3.513904  | 0.791304  | C | -1.899217 | -0.840535 | 3.778536  |
| H | 2.166083  | 4.110058  | 1.625803  | H | -1.263323 | -0.042177 | 4.171967  |
| H | 2.589069  | 3.454782  | 0.048728  | H | -2.847646 | -0.391239 | 3.460674  |
| H | 0.945262  | 4.047710  | 0.352139  | H | -2.125677 | -1.526395 | 4.597430  |

---

**TS3-β3-RS** E = -1110.19608907 (1)

|   |          |           |           |
|---|----------|-----------|-----------|
| C | 0.988307 | -0.698509 | -1.695938 |
| H | 0.112922 | -1.309131 | -1.459788 |
| C | 2.821676 | -1.709528 | -0.540446 |

---

**TS3-β3-SR** E = -1110.19717316 (1)

|   |           |           |           |
|---|-----------|-----------|-----------|
| C | -2.971378 | -0.831053 | 0.218327  |
| H | -2.763011 | -1.828834 | -0.187923 |
| C | -2.525585 | 0.774792  | -1.517010 |



|   |           |           |           |   |           |           |           |
|---|-----------|-----------|-----------|---|-----------|-----------|-----------|
| H | 3.869245  | -2.016664 | -0.532358 | H | -2.814734 | 1.697776  | -2.022770 |
| C | 2.630767  | -0.301557 | 0.052112  | C | -1.538438 | 1.029502  | -0.368620 |
| H | 2.563150  | -0.332515 | 1.144897  | H | -0.521865 | 1.164567  | -0.733811 |
| N | 1.359848  | 0.128527  | -0.529411 | N | -1.677868 | -0.161857 | 0.459621  |
| C | 0.662876  | 1.198540  | -0.128868 | C | -0.798960 | -0.539839 | 1.391014  |
| C | -0.694493 | 1.299753  | -0.506333 | C | 0.505392  | -0.003300 | 1.399366  |
| H | -0.983071 | 0.723883  | -1.381330 | H | 0.623275  | 0.971866  | 0.935339  |
| C | -1.460635 | 2.591562  | -0.357545 | C | 1.428549  | -0.221881 | 2.575355  |
| H | -1.261877 | 3.079643  | 0.601108  | H | 1.037802  | 0.217823  | 3.498651  |
| H | -2.534053 | 2.394747  | -0.415888 | H | 2.396428  | 0.241353  | 2.372042  |
| C | -1.544233 | 0.036102  | 0.829211  | C | 1.357775  | -1.052999 | -0.129933 |
| H | -1.490971 | 0.766097  | 1.635340  | H | 1.469364  | -1.944005 | 0.484354  |
| C | -0.789286 | -1.128858 | 1.046260  | C | 0.493060  | -1.204257 | -1.224086 |
| H | -0.993742 | -2.099339 | 0.620813  | H | 0.517734  | -0.624748 | -2.134660 |
| N | 0.325324  | -1.067824 | 1.844417  | N | -0.528825 | -2.121897 | -1.149207 |
| O | 1.022256  | -2.086101 | 2.015822  | O | -1.353442 | -2.204774 | -2.080796 |
| O | 0.639303  | 0.032955  | 2.354862  | O | -0.629502 | -2.827955 | -0.121562 |
| C | -2.896367 | -0.138696 | 0.229207  | C | 2.606478  | -0.268387 | -0.329537 |
| C | -5.463830 | -0.481682 | -0.846962 | C | 4.985850  | 1.172551  | -0.695506 |
| C | -3.098206 | -0.949806 | -0.893088 | C | 2.607811  | 0.943991  | -1.028947 |
| C | -3.999303 | 0.506857  | 0.795361  | C | 3.814303  | -0.739973 | 0.192726  |
| C | -5.274578 | 0.334583  | 0.263958  | C | 4.996178  | -0.027493 | 0.008802  |
| C | -4.370102 | -1.123577 | -1.425175 | C | 3.786175  | 1.656988  | -1.213829 |
| H | -2.246823 | -1.445224 | -1.354523 | H | 1.675981  | 1.334195  | -1.432180 |
| H | -3.852734 | 1.140881  | 1.665493  | H | 3.823603  | -1.678211 | 0.740600  |
| H | -6.120324 | 0.839222  | 0.719668  | H | 5.925473  | -0.411982 | 0.416524  |
| H | -4.509175 | -1.757356 | -2.295095 | H | 3.768839  | 2.594405  | -1.760331 |
| H | -6.456672 | -0.614920 | -1.263677 | H | 5.905650  | 1.730092  | -0.837988 |
| H | -1.216859 | 3.302395  | -1.153186 | H | 1.609811  | -1.285257 | 2.763525  |
| C | 3.767790  | 0.595854  | -0.398466 | C | -1.950582 | 2.252703  | 0.440970  |
| O | 3.757992  | 1.296752  | -1.380774 | O | -2.566292 | 2.230228  | 1.475478  |
| O | 4.832164  | 0.470714  | 0.407135  | O | -1.573722 | 3.385686  | -0.175276 |
| H | 5.536744  | 1.024790  | 0.037079  | H | -1.899924 | 4.124051  | 0.362192  |
| H | 2.241426  | -2.402037 | 0.074897  | H | -2.051583 | 0.091905  | -2.227563 |

|   |          |           |           |   |           |           |           |
|---|----------|-----------|-----------|---|-----------|-----------|-----------|
| H | 0.749224 | -0.044315 | -2.539493 | H | -3.534106 | -0.921266 | 1.150190  |
| C | 2.225707 | -1.562578 | -1.940865 | C | -3.677983 | 0.063443  | -0.803176 |
| H | 2.920548 | -1.033284 | -2.598980 | H | -4.317656 | 0.789405  | -0.292567 |
| H | 1.971341 | -2.519168 | -2.399986 | H | -4.291274 | -0.523010 | -1.487981 |
| C | 1.310134 | 2.231780  | 0.758681  | C | -1.240844 | -1.560765 | 2.403618  |
| H | 0.601208 | 2.493995  | 1.548166  | H | -1.912522 | -2.284569 | 1.943061  |
| H | 2.170752 | 1.806462  | 1.277141  | H | -0.371004 | -2.125430 | 2.743704  |
| C | 1.725117 | 3.477279  | -0.037799 | C | -1.916496 | -0.843638 | 3.582392  |
| H | 0.861123 | 3.972379  | -0.486077 | H | -2.296779 | -1.568712 | 4.305454  |
| H | 2.212786 | 4.194168  | 0.627527  | H | -1.213641 | -0.183608 | 4.097286  |
| H | 2.422922 | 3.214040  | -0.835165 | H | -2.748058 | -0.222612 | 3.236781  |

---

**TS4-*a1*-RS** E = -1148.29990413 (1)

|   |           |           |           |
|---|-----------|-----------|-----------|
| C | -2.740863 | 0.482495  | -1.800631 |
| C | -2.483808 | -1.789215 | -2.515139 |
| H | -2.090321 | -2.480382 | -3.262520 |
| C | -1.496984 | -1.574836 | -1.356000 |
| H | -1.645303 | -2.283721 | -0.537966 |
| N | -1.834288 | -0.219012 | -0.871219 |
| C | -1.622717 | 0.173155  | 0.399415  |
| C | -0.587374 | -0.394161 | 1.155180  |
| H | -0.115442 | -1.289538 | 0.754495  |
| C | -2.450476 | 1.304847  | 0.972564  |
| H | -3.434713 | 1.321927  | 0.498361  |
| H | -1.962847 | 2.250526  | 0.714291  |
| C | -2.602596 | 1.188991  | 2.492196  |
| H | -3.104021 | 2.085293  | 2.868517  |
| C | -0.598193 | -0.293894 | 2.665644  |
| H | 0.422635  | -0.391095 | 3.047079  |
| C | -0.045520 | -1.797962 | -1.817783 |
| O | 0.644180  | -2.600667 | -1.229939 |
| O | 0.360568  | -1.199769 | -2.929159 |
| H | 0.117149  | -0.217160 | -3.005486 |
| C | 0.978412  | 0.888276  | 0.491146  |

---

**TS4-*a1*-SR** E = -1148.29101301 (1)

|   |           |          |           |
|---|-----------|----------|-----------|
| C | 0.907821  | 0.841262 | 0.675732  |
| H | 1.274980  | 0.102931 | 1.397771  |
| H | -0.100045 | 1.133192 | 0.966901  |
| C | 1.451508  | 1.524393 | -1.564759 |
| H | 1.889757  | 1.264994 | -2.529647 |
| C | 2.485300  | 2.134253 | -0.618337 |
| H | 3.385982  | 1.507934 | -0.591424 |
| N | 1.798657  | 2.026090 | 0.690353  |
| C | 2.219619  | 2.586826 | 1.838900  |
| C | 1.530528  | 2.323988 | 3.040374  |
| H | 0.985973  | 1.385918 | 3.087096  |
| C | 3.437287  | 3.487076 | 1.773653  |
| H | 4.188230  | 3.004823 | 1.138802  |
| H | 3.159709  | 4.417153 | 1.270045  |
| C | 4.033326  | 3.793371 | 3.149125  |
| H | 4.718525  | 4.639479 | 3.054123  |
| H | 4.626812  | 2.938446 | 3.495986  |
| C | 2.097579  | 2.814215 | 4.354482  |
| H | 1.277683  | 2.986608 | 5.061359  |
| H | 2.721475  | 2.032060 | 4.807857  |
| C | -0.317142 | 3.376113 | 2.924133  |

|   |           |           |           |   |           |           |           |
|---|-----------|-----------|-----------|---|-----------|-----------|-----------|
| H | 0.537043  | 1.788223  | 0.912415  | H | 0.192468  | 4.259354  | 3.299128  |
| C | 1.025095  | 0.833680  | -0.906061 | C | -0.751043 | 3.448114  | 1.599652  |
| H | 1.665545  | 0.175488  | -1.471694 | H | -1.532457 | 2.859105  | 1.145755  |
| N | 0.146852  | 1.579242  | -1.642818 | N | -0.026678 | 4.221686  | 0.740127  |
| O | -0.547183 | 2.457719  | -1.110186 | O | -0.280789 | 4.172112  | -0.501533 |
| O | 0.031791  | 1.345718  | -2.889747 | O | 0.898856  | 4.920036  | 1.179423  |
| C | 2.094908  | 0.298515  | 1.263618  | C | 3.008025  | 3.498101  | -1.122761 |
| C | 4.218723  | -0.751640 | 2.748901  | O | 4.188459  | 3.593894  | -1.363361 |
| C | 2.590260  | 0.984768  | 2.377216  | O | 2.157857  | 4.463560  | -1.390784 |
| C | 2.665007  | -0.930716 | 0.906867  | H | 1.214130  | 4.340449  | -1.077648 |
| C | 3.721023  | -1.447583 | 1.647764  | H | 0.639928  | 2.243042  | -1.716495 |
| C | 3.651179  | 0.465816  | 3.113242  | C | 0.959571  | 0.319607  | -0.765960 |
| H | 2.144625  | 1.935366  | 2.658884  | H | 1.679166  | -0.500211 | -0.844586 |
| H | 2.266674  | -1.492836 | 0.064735  | H | -0.011618 | -0.049277 | -1.099106 |
| H | 4.154292  | -2.401834 | 1.366862  | C | -1.138730 | 2.639076  | 3.911662  |
| H | 4.031765  | 1.011379  | 3.970538  | C | -2.722764 | 1.306563  | 5.801934  |
| H | 5.042838  | -1.161204 | 3.323879  | C | -1.736565 | 1.410610  | 3.603611  |
| H | -2.373935 | 1.501379  | -1.958959 | C | -1.340398 | 3.182939  | 5.184430  |
| H | -1.153683 | -1.152937 | 3.066617  | C | -2.130182 | 2.523760  | 6.122206  |
| H | -3.247670 | 0.335017  | 2.733805  | C | -2.523020 | 0.750676  | 4.538926  |
| C | -1.246091 | 0.995608  | 3.163655  | H | -1.576393 | 0.964743  | 2.625105  |
| H | -1.354450 | 0.963353  | 4.251709  | H | -0.886866 | 4.139205  | 5.430329  |
| H | -0.600748 | 1.854104  | 2.935004  | H | -2.282124 | 2.963191  | 7.102472  |
| H | -3.414838 | -2.203109 | -2.116323 | H | -2.978795 | -0.200900 | 4.285692  |
| H | -3.750794 | 0.520412  | -1.376058 | H | -3.336009 | 0.789765  | 6.532607  |
| C | -2.718441 | -0.378613 | -3.060099 | C | 2.935756  | 4.076315  | 4.168532  |
| H | -1.898186 | -0.067242 | -3.709354 | H | 3.363048  | 4.388635  | 5.125708  |
| H | -3.649349 | -0.295230 | -3.623414 | H | 2.307006  | 4.899175  | 3.803271  |

---

**TS4- $\beta$ 1-RS** E = -1148.29349361 (1)

|   |          |           |           |
|---|----------|-----------|-----------|
| C | 2.743369 | -0.770489 | -0.194774 |
| C | 1.029544 | -1.475336 | -1.724307 |
| N | 1.441575 | -0.398815 | -0.790658 |
| C | 0.709085 | 0.719012  | -0.650336 |

---

**TS4- $\beta$ 1-SR** E = -1148.28954041 (1)

|   |          |          |           |
|---|----------|----------|-----------|
| C | 1.380011 | 2.996655 | -0.600349 |
| H | 0.342271 | 3.176080 | -0.315091 |
| H | 1.922948 | 3.950517 | -0.588720 |
| C | 2.915016 | 1.668674 | -1.839940 |

|   |           |           |           |   |           |           |           |
|---|-----------|-----------|-----------|---|-----------|-----------|-----------|
| C | -0.653311 | 0.687076  | -0.996771 | H | 3.075109  | 0.840969  | -2.531597 |
| H | -0.993664 | -0.152079 | -1.594060 | C | 3.010865  | 1.208237  | -0.373563 |
| C | -1.437406 | 1.961426  | -1.218662 | H | 2.748177  | 0.156452  | -0.251261 |
| H | -1.350754 | 2.248737  | -2.275911 | N | 2.021669  | 2.055646  | 0.326875  |
| C | -1.389539 | -0.165719 | 0.817646  | C | 1.860613  | 2.064612  | 1.652121  |
| H | -1.129839 | 0.703957  | 1.415176  | C | 2.444587  | 1.066276  | 2.463422  |
| C | -0.687758 | -1.333855 | 1.126898  | H | 3.280765  | 0.548053  | 2.011542  |
| H | -1.003237 | -2.336297 | 0.880432  | C | 0.963496  | 3.127526  | 2.232883  |
| N | 0.514820  | -1.273069 | 1.775550  | H | 1.401125  | 4.096241  | 1.952946  |
| O | 0.969073  | -0.144327 | 2.124685  | H | -0.021703 | 3.081331  | 1.753917  |
| O | 1.158002  | -2.311680 | 1.987723  | C | 0.809252  | 3.036655  | 3.752179  |
| C | -2.817848 | -0.282266 | 0.438812  | H | 0.066857  | 2.270725  | 4.003754  |
| C | -5.533957 | -0.480079 | -0.220772 | H | 0.424748  | 3.990808  | 4.123134  |
| C | -3.745030 | 0.625356  | 0.959756  | C | 2.592980  | 1.294835  | 3.958308  |
| C | -3.269341 | -1.284429 | -0.428217 | H | 2.014267  | 0.540095  | 4.507336  |
| C | -4.616045 | -1.384368 | -0.753482 | H | 3.638864  | 1.132510  | 4.232687  |
| C | -5.095179 | 0.525006  | 0.635715  | C | 1.272181  | -0.522699 | 2.174530  |
| H | -3.401729 | 1.409692  | 1.629091  | H | 1.282651  | -0.435592 | 1.090239  |
| H | -2.556344 | -1.984335 | -0.857772 | C | 2.004166  | -1.613954 | 2.684020  |
| H | -4.951626 | -2.165977 | -1.427218 | H | 1.871314  | -2.075430 | 3.648924  |
| H | -5.803154 | 1.233751  | 1.052533  | N | 3.109629  | -2.053745 | 2.006134  |
| H | -6.585285 | -0.557488 | -0.477125 | O | 3.828881  | -2.930689 | 2.478581  |
| H | 0.805590  | -1.013224 | -2.692126 | O | 3.369312  | -1.530230 | 0.869493  |
| C | 1.306384  | 1.983522  | -0.067404 | C | 4.429031  | 1.486183  | 0.167825  |
| H | 2.351699  | 2.060351  | -0.368690 | O | 4.840740  | 2.617708  | 0.222485  |
| H | 1.282472  | 1.916475  | 1.024329  | O | 5.157973  | 0.434554  | 0.507557  |
| H | 2.528705  | -1.451954 | 0.643671  | H | 4.622955  | -0.397663 | 0.579580  |
| H | -2.500905 | 1.770033  | -1.045521 | H | 3.676695  | 2.432646  | -2.018330 |
| C | -0.935650 | 3.110717  | -0.351019 | C | 1.523552  | 2.294061  | -1.945066 |
| H | -1.445833 | 4.038819  | -0.624920 | H | 0.755882  | 1.519586  | -2.040448 |
| H | -1.167222 | 2.918611  | 0.705160  | H | 1.427978  | 2.983008  | -2.785787 |
| C | 0.571498  | 3.246595  | -0.527217 | C | -0.038150 | -0.170354 | 2.774656  |
| H | 0.791100  | 3.434770  | -1.585476 | C | -2.504153 | 0.635793  | 3.847515  |
| H | 0.962937  | 4.098668  | 0.035134  | C | -0.972550 | 0.518896  | 1.990753  |

|   |          |           |           |   |           |           |          |
|---|----------|-----------|-----------|---|-----------|-----------|----------|
| C | 3.402427 | -1.570285 | -1.308766 | C | -0.372883 | -0.473000 | 4.099410 |
| H | 4.243906 | -2.158791 | -0.940004 | C | -1.595024 | -0.069883 | 4.630806 |
| H | 0.130309 | -1.981471 | -1.366458 | C | -2.192526 | 0.923278  | 2.519456 |
| C | 3.648473 | 0.343249  | 0.349055  | H | -0.726692 | 0.737664  | 0.952958 |
| O | 4.498718 | 0.861884  | -0.330449 | H | 0.321523  | -1.026624 | 4.722766 |
| O | 3.476876 | 0.635004  | 1.630414  | H | -1.837366 | -0.310551 | 5.660728 |
| H | 2.669779 | 0.187812  | 1.987100  | H | -2.904004 | 1.455107  | 1.895746 |
| H | 3.767536 | -0.879142 | -2.073421 | H | -3.455471 | 0.949224  | 4.264433 |
| C | 2.232909 | -2.424385 | -1.796023 | C | 2.146048  | 2.689431  | 4.399423 |
| H | 2.081528 | -3.261942 | -1.109449 | H | 2.897759  | 3.431211  | 4.101548 |
| H | 2.371918 | -2.824778 | -2.801401 | H | 2.068596  | 2.728615  | 5.489523 |

---

**TS4- $\beta$ 2-RS** E = -1148.28534195 (1)

|   |           |           |           |
|---|-----------|-----------|-----------|
| C | 0.964353  | -1.447414 | -1.392983 |
| C | 2.816411  | -2.166102 | -0.068221 |
| H | 3.856003  | -2.488656 | 0.000164  |
| C | 2.685640  | -0.649971 | 0.151975  |
| H | 2.602197  | -0.408069 | 1.217171  |
| N | 1.417526  | -0.328499 | -0.528513 |
| C | 0.743954  | 0.813584  | -0.338457 |
| C | -0.636586 | 0.871673  | -0.684658 |
| H | -0.929306 | 0.147871  | -1.440945 |
| C | 1.481069  | 2.003175  | 0.226060  |
| H | 2.148297  | 2.375995  | -0.566356 |
| H | 2.107322  | 1.698818  | 1.065426  |
| C | 0.517887  | 3.112081  | 0.633142  |
| H | 1.090737  | 3.994685  | 0.928823  |
| C | -1.316519 | 2.231588  | -0.847981 |
| H | -1.715350 | 2.314745  | -1.863281 |
| C | 3.903140  | 0.073121  | -0.431109 |
| O | 4.956850  | 0.090756  | 0.137588  |
| O | 3.756269  | 0.631644  | -1.651575 |
| H | 2.835936  | 0.545960  | -1.935459 |
| C | -1.525642 | 0.000268  | 0.771853  |

---

**TS4- $\beta$ 2-SR** E = -1148.28787139 (1)

|   |           |           |           |
|---|-----------|-----------|-----------|
| C | -3.046222 | 0.313222  | 0.655139  |
| H | -3.704401 | 0.989354  | 0.104000  |
| C | -2.425322 | -1.991398 | 0.894303  |
| H | -2.643062 | -3.040797 | 0.692832  |
| C | -1.527726 | -1.392436 | -0.195578 |
| H | -0.480187 | -1.618500 | -0.019275 |
| N | -1.797013 | 0.052585  | -0.100904 |
| C | -0.978184 | 1.020104  | -0.538814 |
| C | 0.367083  | 0.712394  | -0.881009 |
| H | 0.525876  | -0.297537 | -1.253639 |
| C | -1.548131 | 2.421972  | -0.621709 |
| H | -1.648980 | 2.811388  | 0.394323  |
| H | -2.561097 | 2.352020  | -1.035933 |
| C | -0.709759 | 3.368383  | -1.484604 |
| H | -0.902573 | 3.172896  | -2.546659 |
| H | -1.024485 | 4.396552  | -1.287595 |
| C | 0.778039  | 3.180065  | -1.212844 |
| H | 1.368826  | 3.910823  | -1.772315 |
| H | 0.976245  | 3.347894  | -0.146323 |
| C | 1.183533  | 1.763853  | -1.613263 |
| H | 1.052249  | 1.644687  | -2.696348 |

|   |           |           |           |   |           |           |           |
|---|-----------|-----------|-----------|---|-----------|-----------|-----------|
| H | -1.502097 | 0.869975  | 1.427472  | H | 2.245820  | 1.588817  | -1.415217 |
| C | -0.827543 | -1.118328 | 1.294878  | C | -1.881046 | -1.976352 | -1.572593 |
| H | -1.073673 | -2.154213 | 1.118781  | O | -1.604109 | -3.110806 | -1.846347 |
| N | 0.287011  | -0.893614 | 2.045642  | O | -2.539202 | -1.180864 | -2.430801 |
| O | 0.630630  | 0.302122  | 2.248371  | H | -2.637107 | -0.300897 | -2.041244 |
| O | 0.970154  | -1.845601 | 2.472559  | H | -2.765241 | 0.782461  | 1.607350  |
| C | -2.878456 | -0.287579 | 0.202378  | H | -1.921625 | -1.888549 | 1.859256  |
| C | -5.432146 | -0.837268 | -0.818090 | C | -3.651245 | -1.075905 | 0.856360  |
| C | -3.989411 | 0.442404  | 0.631258  | H | -4.300713 | -1.339714 | 0.014239  |
| C | -3.065535 | -1.294019 | -0.751269 | H | -4.238785 | -1.121677 | 1.773603  |
| C | -4.330374 | -1.570140 | -1.256071 | C | 1.287813  | 0.450964  | 0.816648  |
| C | -5.258349 | 0.168712  | 0.126798  | H | 1.423793  | 1.515844  | 0.997407  |
| H | -3.858010 | 1.219881  | 1.378881  | C | 0.501225  | -0.194398 | 1.799355  |
| H | -2.208878 | -1.866085 | -1.101941 | H | 0.590830  | -1.229063 | 2.094796  |
| H | -4.458035 | -2.355811 | -1.993707 | N | -0.506597 | 0.503935  | 2.400404  |
| H | -6.110999 | 0.742462  | 0.475032  | O | -0.672089 | 1.705788  | 2.074826  |
| H | -6.419809 | -1.050066 | -1.213475 | O | -1.272806 | -0.060600 | 3.208604  |
| H | 0.665577  | -1.056644 | -2.371471 | C | 2.537705  | -0.259050 | 0.407745  |
| H | 2.229451  | -2.662627 | 0.709109  | C | 4.915431  | -1.563082 | -0.308053 |
| H | 0.109917  | -1.951045 | -0.938477 | C | 3.755956  | 0.425965  | 0.410031  |
| C | 2.187174  | -2.363806 | -1.447763 | C | 2.528132  | -1.606998 | 0.033208  |
| H | 2.874558  | -2.035517 | -2.235147 | C | 3.705937  | -2.254990 | -0.320213 |
| H | 1.907887  | -3.398448 | -1.651214 | C | 4.937530  | -0.221044 | 0.058291  |
| H | -0.053156 | 2.782543  | 1.508609  | H | 3.774926  | 1.472564  | 0.702348  |
| H | -2.189966 | 2.269741  | -0.185728 | H | 1.591703  | -2.160519 | 0.014174  |
| C | -0.409310 | 3.427186  | -0.537801 | H | 3.678884  | -3.300474 | -0.609110 |
| H | -1.023764 | 4.307329  | -0.329339 | H | 5.874904  | 0.325435  | 0.071189  |
| H | 0.204525  | 3.670790  | -1.414423 | H | 5.834419  | -2.068316 | -0.586037 |

---

**TS4-β3-RS** E = -1148.29670675 (1)

|   |           |           |           |
|---|-----------|-----------|-----------|
| C | -0.231371 | 0.567868  | -2.173273 |
| C | 0.241668  | -1.540103 | -3.199611 |
| H | 0.668199  | -2.104216 | -4.030769 |
| C | 1.249836  | -1.357678 | -2.051397 |

---

**TS4-β3-SR** E = -1148.29742699 (1)

|   |           |           |           |
|---|-----------|-----------|-----------|
| C | -0.698669 | 1.769316  | -2.548733 |
| C | -0.529911 | -0.528849 | -3.236570 |
| H | -0.146362 | -1.256880 | -3.953581 |
| C | 0.433573  | -0.315792 | -2.059530 |

|   |           |           |           |   |           |           |           |
|---|-----------|-----------|-----------|---|-----------|-----------|-----------|
| H | 1.259193  | -2.228734 | -1.385431 | H | 0.344167  | -1.106305 | -1.317654 |
| N | 0.731030  | -0.187959 | -1.344428 | N | 0.031115  | 0.984874  | -1.534071 |
| C | 1.164981  | 0.211497  | -0.148305 | C | 0.347061  | 1.450693  | -0.328389 |
| C | 0.372066  | 1.116856  | 0.602866  | C | 0.816055  | 0.570305  | 0.679452  |
| H | -0.296292 | 1.733920  | 0.009387  | H | 1.312995  | -0.323537 | 0.313992  |
| C | 2.463310  | -0.338754 | 0.384989  | C | 0.127019  | 2.920022  | -0.070166 |
| H | 3.262633  | 0.168697  | -0.174156 | H | -0.844417 | 3.222931  | -0.461264 |
| H | 2.537714  | -1.407870 | 0.180760  | H | 0.902869  | 3.453628  | -0.640873 |
| C | 2.622303  | -0.057875 | 1.874799  | C | 0.248154  | 3.266457  | 1.409388  |
| H | 3.620355  | -0.368238 | 2.196134  | H | 0.240404  | 4.353506  | 1.527194  |
| C | 0.960080  | 1.830283  | 1.815516  | C | 1.433708  | 1.130362  | 1.956121  |
| H | 0.893660  | 2.912212  | 1.666010  | H | 2.423665  | 0.688070  | 2.101675  |
| C | 2.632718  | -1.084712 | -2.613948 | C | 1.874968  | -0.238328 | -2.544840 |
| O | 3.134757  | 0.004629  | -2.740261 | O | 2.489087  | 0.775745  | -2.752407 |
| O | 3.223906  | -2.221252 | -3.010589 | O | 2.373266  | -1.468154 | -2.758107 |
| H | 4.079677  | -1.977548 | -3.395932 | H | 3.271645  | -1.355076 | -3.105410 |
| C | -1.060653 | -0.050644 | 1.297538  | C | -0.854502 | -0.364719 | 1.236441  |
| H | -0.451345 | -0.437603 | 2.112237  | H | -1.189452 | 0.463726  | 1.857485  |
| C | -1.485934 | -1.035687 | 0.380600  | C | -1.711671 | -0.662086 | 0.158267  |
| H | -2.386460 | -0.998699 | -0.212927 | H | -1.816242 | -1.626160 | -0.316434 |
| N | -0.685661 | -2.123191 | 0.164042  | N | -2.442935 | 0.349889  | -0.408057 |
| O | 0.392429  | -2.208920 | 0.803819  | O | -2.362806 | 1.498131  | 0.088259  |
| O | -1.006270 | -2.980752 | -0.683145 | O | -3.134887 | 0.127304  | -1.422589 |
| C | -2.084282 | 0.949225  | 1.721891  | C | -0.301835 | -1.520310 | 2.000806  |
| C | -4.031002 | 2.791557  | 2.551183  | C | 0.702015  | -3.689970 | 3.471477  |
| C | -2.291205 | 1.206262  | 3.079590  | C | -0.364485 | -1.527672 | 3.396875  |
| C | -2.864289 | 1.636221  | 0.784836  | C | 0.278096  | -2.617424 | 1.353187  |
| C | -3.831208 | 2.546368  | 1.193537  | C | 0.772848  | -3.693652 | 2.079382  |
| C | -3.258599 | 2.119088  | 3.492434  | C | 0.131387  | -2.604372 | 4.127636  |
| H | -1.698266 | 0.672256  | 3.817072  | H | -0.821856 | -0.687091 | 3.911411  |
| H | -2.707159 | 1.456208  | -0.276494 | H | 0.344037  | -2.630416 | 0.267308  |
| H | -4.428112 | 3.068941  | 0.452975  | H | 1.217845  | -4.535824 | 1.559341  |
| H | -3.408321 | 2.302196  | 4.551538  | H | 0.069246  | -2.593486 | 5.210986  |
| H | -4.783611 | 3.504599  | 2.871136  | H | 1.091074  | -4.528755 | 4.039166  |

|   |           |           |           |   |           |           |           |
|---|-----------|-----------|-----------|---|-----------|-----------|-----------|
| H | 0.054946  | 1.623530  | -2.183978 | H | -0.209558 | 2.733108  | -2.706129 |
| H | -0.614484 | -2.086243 | -2.794954 | H | 0.836347  | 0.805987  | 2.818684  |
| H | -1.238427 | 0.474065  | -1.760878 | H | -0.629010 | 2.876070  | 1.939704  |
| C | -0.124643 | -0.096541 | -3.546642 | C | 1.526995  | 2.657536  | 1.976259  |
| H | 0.677020  | 0.374235  | -4.123338 | H | 1.709614  | 3.001892  | 2.998311  |
| H | -1.053776 | -0.014344 | -4.112684 | H | 2.378206  | 2.989779  | 1.368452  |
| H | 1.896752  | -0.661628 | 2.432247  | H | -1.488162 | -0.868720 | -2.833927 |
| H | 0.333397  | 1.616740  | 2.691050  | H | -1.720002 | 1.924704  | -2.176200 |
| C | 2.405284  | 1.431191  | 2.132092  | C | -0.676155 | 0.887594  | -3.799189 |
| H | 2.639166  | 1.691400  | 3.168414  | H | 0.183895  | 1.141705  | -4.425748 |
| H | 3.096963  | 1.999345  | 1.497465  | H | -1.586325 | 1.008266  | -4.387378 |

---

**β3-RS-H** E = -843.089866905 (1)

|   |           |           |           |
|---|-----------|-----------|-----------|
| C | 1.079386  | -0.646801 | -1.665707 |
| H | 0.227934  | -1.281395 | -1.408079 |
| C | 2.970266  | -1.603456 | -0.541458 |
| H | 4.024479  | -1.883160 | -0.571186 |
| C | 2.753328  | -0.218865 | 0.064211  |
| H | 2.667371  | -0.233359 | 1.155067  |
| N | 1.456191  | 0.183093  | -0.507779 |
| C | 0.758018  | 1.212260  | -0.064475 |
| C | -0.596092 | 1.415172  | -0.379964 |
| H | -0.939379 | 0.963946  | -1.309521 |
| C | -1.220148 | 2.746929  | -0.040238 |
| H | -0.848615 | 3.108087  | 0.924101  |
| H | -2.307979 | 2.654719  | 0.027621  |
| C | -1.466320 | 0.119316  | 0.864050  |
| H | -1.447623 | 0.828989  | 1.689170  |
| C | -0.698432 | -1.039893 | 1.087612  |
| H | -0.882329 | -2.013623 | 0.660181  |
| N | 0.417838  | -0.948993 | 1.877922  |
| O | 1.143586  | -1.947576 | 2.051730  |
| O | 0.706672  | 0.167137  | 2.375991  |
| C | -2.801533 | -0.055806 | 0.226352  |

---

**β3-SR-H** E = -843.091397276 (1)

|   |           |           |           |
|---|-----------|-----------|-----------|
| C | -3.030450 | -0.947347 | 0.408238  |
| H | -2.755754 | -1.968906 | 0.119587  |
| C | -2.633241 | 0.446340  | -1.509044 |
| H | -2.970462 | 1.269111  | -2.141783 |
| C | -1.684049 | 0.911121  | -0.407413 |
| H | -0.654272 | 1.030927  | -0.740686 |
| N | -1.786671 | -0.172378 | 0.579901  |
| C | -0.896548 | -0.456716 | 1.512144  |
| C | 0.408145  | 0.059518  | 1.546180  |
| H | 0.558028  | 1.023787  | 1.065261  |
| C | 1.230907  | -0.171099 | 2.790406  |
| H | 0.993707  | 0.551119  | 3.577471  |
| H | 2.297881  | -0.076746 | 2.569591  |
| C | 1.302228  | -1.072092 | 0.129019  |
| H | 1.468024  | -1.885966 | 0.831703  |
| C | 0.439985  | -1.392478 | -0.933449 |
| H | 0.441697  | -0.933898 | -1.910714 |
| N | -0.544465 | -2.326322 | -0.729978 |
| O | -1.364188 | -2.573745 | -1.638468 |
| O | -0.625517 | -2.877650 | 0.392742  |
| C | 2.509911  | -0.257026 | -0.177167 |



|   |           |           |           |   |           |           |           |
|---|-----------|-----------|-----------|---|-----------|-----------|-----------|
| C | -5.335412 | -0.387272 | -0.931638 | C | 4.814840  | 1.240119  | -0.745525 |
| C | -2.970697 | -0.861672 | -0.905431 | C | 2.447163  | 0.863876  | -1.013491 |
| C | -3.920393 | 0.589577  | 0.760389  | C | 3.745262  | -0.609124 | 0.374521  |
| C | -5.179019 | 0.423475  | 0.187904  | C | 4.890002  | 0.131563  | 0.091392  |
| C | -4.225489 | -1.030300 | -1.477583 | C | 3.587900  | 1.604030  | -1.298337 |
| H | -2.106372 | -1.356547 | -1.342477 | H | 1.493786  | 1.157951  | -1.446150 |
| H | -3.801061 | 1.214715  | 1.641085  | H | 3.807334  | -1.480992 | 1.020021  |
| H | -6.037519 | 0.927575  | 0.619810  | H | 5.841046  | -0.160922 | 0.524523  |
| H | -4.339003 | -1.660831 | -2.353605 | H | 3.520700  | 2.468807  | -1.950620 |
| H | -6.315020 | -0.516458 | -1.379829 | H | 5.705178  | 1.819696  | -0.965897 |
| H | 1.237543  | 1.809859  | 0.704386  | H | -1.178242 | -1.259820 | 2.187449  |
| H | -1.000033 | 3.507465  | -0.795162 | H | 1.053845  | -1.175817 | 3.187518  |
| H | 2.424599  | -2.330553 | 0.066792  | H | -2.132207 | -0.309759 | -2.120912 |
| H | 0.795206  | -0.000988 | -2.502929 | H | -3.587574 | -0.972995 | 1.348582  |
| C | 2.340698  | -1.473083 | -1.932135 | C | -3.767003 | -0.215563 | -0.716352 |
| H | 3.009219  | -0.923370 | -2.602718 | H | -4.437524 | 0.546467  | -0.305568 |
| H | 2.108673  | -2.433620 | -2.394991 | H | -4.355626 | -0.905387 | -1.322013 |
| H | 3.529049  | 0.492414  | -0.244247 | H | -2.021453 | 1.850427  | 0.053146  |

---

**$\beta$ 3-RS-Nitro** E = -1047.51726865 (1)

|   |           |           |           |
|---|-----------|-----------|-----------|
| C | 1.102192  | -0.637326 | -1.667837 |
| H | 0.240258  | -1.271121 | -1.447363 |
| C | 2.981496  | -1.588560 | -0.508804 |
| H | 4.044788  | -1.827068 | -0.493354 |
| C | 2.707525  | -0.214061 | 0.088490  |
| H | 2.689820  | -0.177084 | 1.182219  |
| N | 1.443548  | 0.167231  | -0.476624 |
| C | 0.748905  | 1.205598  | -0.026447 |
| C | -0.612678 | 1.384070  | -0.339060 |
| H | -0.929427 | 0.940213  | -1.282249 |
| C | -1.232341 | 2.728236  | -0.030730 |
| H | -0.893302 | 3.089546  | 0.945118  |
| H | -2.322321 | 2.649317  | -0.006795 |
| C | -1.473954 | 0.137584  | 0.846686  |

---

**$\beta$ 3-SR-Nitro** E = -1047.51907024 (1)

|   |           |           |           |
|---|-----------|-----------|-----------|
| C | -3.062887 | -0.939960 | 0.438699  |
| H | -2.801199 | -1.978646 | 0.208254  |
| C | -2.626188 | 0.415294  | -1.509111 |
| H | -2.925541 | 1.260630  | -2.130143 |
| C | -1.671470 | 0.840505  | -0.398221 |
| H | -0.651852 | 1.046011  | -0.708922 |
| N | -1.795545 | -0.191887 | 0.585475  |
| C | -0.898007 | -0.479512 | 1.519704  |
| C | 0.417795  | 0.018623  | 1.525784  |
| H | 0.555743  | 0.996249  | 1.065860  |
| C | 1.234606  | -0.199739 | 2.779354  |
| H | 0.966535  | 0.513058  | 3.563655  |
| H | 2.299636  | -0.076241 | 2.567145  |
| C | 1.295979  | -1.045042 | 0.148143  |

|   |           |           |           |   |           |           |           |
|---|-----------|-----------|-----------|---|-----------|-----------|-----------|
| H | -1.469516 | 0.824416  | 1.692362  | H | 1.475495  | -1.883018 | 0.819787  |
| C | -0.719366 | -1.040969 | 1.078790  | C | 0.438175  | -1.358631 | -0.931465 |
| H | -0.924968 | -2.016175 | 0.664796  | H | 0.469864  | -0.915717 | -1.915674 |
| N | 0.402629  | -0.947806 | 1.847294  | N | -0.554279 | -2.278450 | -0.727086 |
| O | 1.142166  | -1.939473 | 2.022222  | O | -1.382739 | -2.525288 | -1.629058 |
| O | 0.701503  | 0.182928  | 2.319671  | O | -0.639181 | -2.812697 | 0.406841  |
| C | -2.816420 | -0.044206 | 0.217319  | C | 2.511780  | -0.238056 | -0.164367 |
| C | -5.353686 | -0.389053 | -0.923658 | C | 4.822935  | 1.239643  | -0.744572 |
| C | -2.984267 | -0.837108 | -0.923006 | C | 2.445212  | 0.905574  | -0.967821 |
| C | -3.936623 | 0.581539  | 0.770105  | C | 3.752424  | -0.623819 | 0.350324  |
| C | -5.197878 | 0.408147  | 0.205775  | C | 4.901216  | 0.107431  | 0.060031  |
| C | -4.241658 | -1.012136 | -1.487851 | C | 3.589942  | 1.637623  | -1.258486 |
| H | -2.118466 | -1.318859 | -1.372293 | H | 1.488304  | 1.228057  | -1.372779 |
| H | -3.816842 | 1.197512  | 1.657169  | H | 3.815398  | -1.512495 | 0.972411  |
| H | -6.058523 | 0.896437  | 0.651091  | H | 5.857363  | -0.209913 | 0.463118  |
| H | -4.355551 | -1.632173 | -2.371137 | H | 3.520148  | 2.521801  | -1.883486 |
| H | -6.335324 | -0.523275 | -1.365692 | H | 5.716482  | 1.812368  | -0.969328 |
| H | 1.243436  | 1.834510  | 0.704808  | H | -1.200710 | -1.248103 | 2.223271  |
| H | -0.966983 | 3.475796  | -0.782646 | H | 1.078115  | -1.211354 | 3.166652  |
| H | 2.435258  | -2.306823 | 0.109025  | H | -2.108118 | -0.334359 | -2.114301 |
| H | 0.857605  | 0.032090  | -2.497231 | H | -3.625961 | -0.887371 | 1.372695  |
| C | 2.372128  | -1.460888 | -1.909625 | C | -3.771312 | -0.245439 | -0.729127 |
| H | 3.048803  | -0.912642 | -2.571786 | H | -4.469460 | 0.509725  | -0.359763 |
| H | 2.151660  | -2.425781 | -2.367158 | H | -4.317333 | -0.961723 | -1.342922 |
| N | 3.805831  | 0.755777  | -0.357249 | N | -2.168285 | 2.171836  | 0.187145  |
| O | 3.517729  | 1.647856  | -1.129666 | O | -2.888266 | 2.137827  | 1.162838  |
| O | 4.905918  | 0.532153  | 0.100116  | O | -1.822979 | 3.163758  | -0.421538 |

---

***E*-enamine (E2)** E = -517.6603555 (0)

|   |           |           |           |
|---|-----------|-----------|-----------|
| C | -0.054455 | 0.991307  | -1.972836 |
| C | -0.150832 | -0.078330 | -0.865308 |
| H | -1.071865 | -0.666108 | -0.961465 |
| C | -0.130817 | 2.118836  | 0.116255  |
| N | -0.124326 | 0.677016  | 0.387478  |

---

**iminium-1** E = -518.051614 (0)

|   |          |           |           |
|---|----------|-----------|-----------|
| C | 0.637368 | 0.129653  | 0.696369  |
| H | 0.144592 | 0.428719  | 1.625420  |
| C | 1.964038 | -0.608530 | 0.928833  |
| H | 2.791135 | 0.093292  | 1.031934  |
| C | 0.639022 | -2.025314 | -0.463221 |

|   |           |           |           |   |           |           |           |
|---|-----------|-----------|-----------|---|-----------|-----------|-----------|
| C | -0.840467 | 0.194373  | 1.490762  | H | 0.362312  | -2.305803 | -1.479635 |
| C | -1.239503 | -1.066103 | 1.685795  | N | -0.190438 | -0.858734 | -0.032993 |
| H | -1.029669 | -1.825791 | 0.935720  | C | -1.421396 | -0.700556 | -0.356426 |
| C | -1.956981 | -1.512138 | 2.924961  | H | -1.855740 | -1.503036 | -0.955603 |
| H | -2.111598 | -0.676606 | 3.612997  | C | -2.300760 | 0.434334  | 0.013604  |
| H | -2.937398 | -1.937757 | 2.687648  | H | -2.413477 | 1.027749  | -0.904226 |
| H | -1.020649 | 0.949661  | 2.254242  | H | -1.827021 | 1.085197  | 0.751313  |
| H | -1.392592 | -2.285780 | 3.455847  | C | -3.671346 | -0.065347 | 0.493005  |
| H | -1.059789 | 1.235649  | -2.327226 | H | -4.157797 | -0.678735 | -0.269090 |
| H | 0.403141  | 2.656387  | 0.905065  | H | -4.316015 | 0.790065  | 0.695645  |
| H | -1.157565 | 2.511555  | 0.062505  | H | -3.585533 | -0.651081 | 1.410158  |
| C | 0.548326  | 2.198694  | -1.246845 | H | 1.896460  | -1.200621 | 1.845069  |
| H | 1.629815  | 2.072901  | -1.129859 | H | 0.423227  | -2.850413 | 0.221312  |
| H | 0.362758  | 3.144986  | -1.757394 | C | 2.067752  | -1.517407 | -0.300030 |
| H | 0.529674  | 0.636544  | -2.823047 | H | 2.772955  | -2.337152 | -0.163987 |
| C | 1.015873  | -1.072956 | -0.955977 | H | 2.369451  | -0.946097 | -1.182833 |
| O | 1.123362  | -1.843005 | -1.873060 | C | 0.790894  | 1.367034  | -0.198225 |
| O | 1.905926  | -0.993426 | 0.036313  | O | 0.206119  | 1.522869  | -1.236596 |
| H | 1.585774  | -0.292052 | 0.635289  | O | 1.641313  | 2.223140  | 0.353773  |
|   |           |           |           | H | 1.715636  | 3.007777  | -0.215394 |

---

**Z-enamine (Z1)** E = -517.637769662 (0)

|   |           |           |           |
|---|-----------|-----------|-----------|
| C | -0.723095 | 1.192459  | -1.705129 |
| H | -0.674585 | 1.708797  | -2.666043 |
| H | -1.756339 | 0.863857  | -1.544622 |
| C | 0.225374  | -0.003544 | -1.642194 |
| H | 1.190343  | 0.228338  | -2.114389 |
| H | -0.181903 | -0.894653 | -2.125889 |
| C | 0.030771  | 0.986733  | 0.543780  |
| H | 0.819311  | 1.302287  | 1.236310  |
| N | 0.422614  | -0.225231 | -0.191175 |
| C | 1.616500  | -0.866755 | 0.210123  |
| H | 2.242599  | -0.295867 | 0.895502  |
| C | 2.000142  | -2.077538 | -0.200010 |

---

**Z-enamine (Z2)** E = -517.639437993 (0)

|   |           |           |           |
|---|-----------|-----------|-----------|
| C | -0.776163 | 0.815142  | -2.187539 |
| H | -0.762059 | 1.190509  | -3.212669 |
| H | -1.821543 | 0.690366  | -1.882991 |
| C | -0.016789 | -0.502489 | -2.042916 |
| H | 0.898368  | -0.482537 | -2.653171 |
| H | -0.602298 | -1.376821 | -2.341370 |
| C | 0.166857  | 0.765836  | -0.005998 |
| H | 1.039243  | 1.029501  | 0.598302  |
| N | 0.333989  | -0.571868 | -0.609669 |
| C | 1.501698  | -1.308693 | -0.306450 |
| H | 2.022298  | -1.687895 | -1.185131 |
| C | 1.991849  | -1.566269 | 0.908899  |

|   |           |           |           |   |           |           |           |
|---|-----------|-----------|-----------|---|-----------|-----------|-----------|
| H | 2.970140  | -2.429173 | 0.138518  | H | 2.931207  | -2.111072 | 0.939149  |
| C | -0.253259 | 2.048272  | -0.526803 | C | -0.041191 | 1.716831  | -1.193049 |
| H | 0.674182  | 2.569017  | -0.785983 | H | 0.930620  | 2.015562  | -1.599507 |
| H | -0.983120 | 2.780981  | -0.179209 | H | -0.592890 | 2.611286  | -0.899343 |
| C | 1.184995  | -2.995162 | -1.064537 | C | 1.373386  | -1.198967 | 2.227458  |
| H | 1.409047  | -2.872599 | -2.131470 | H | 1.517233  | -2.007572 | 2.950149  |
| H | 0.114128  | -2.809941 | -0.927906 | H | 0.297895  | -1.025239 | 2.141019  |
| H | 1.382053  | -4.040168 | -0.811201 | H | 1.825214  | -0.299675 | 2.663401  |
| C | -1.227188 | 0.741134  | 1.396838  | C | -1.069786 | 0.823725  | 0.906301  |
| O | -1.750234 | 1.621787  | 2.027195  | O | -1.396107 | 1.829333  | 1.478579  |
| O | -1.688314 | -0.510226 | 1.364643  | O | -1.766789 | -0.316107 | 0.979156  |
| H | -1.084021 | -0.998377 | 0.762938  | H | -1.268958 | -0.962460 | 0.429820  |

---

**TS1-Z1-RS** E = -1031.58834894 (1)

|   |           |           |           |
|---|-----------|-----------|-----------|
| C | -3.693296 | -0.628257 | -0.131116 |
| H | -4.657794 | -1.113312 | -0.289055 |
| H | -3.431296 | -0.703188 | 0.926123  |
| C | -2.592668 | -1.282399 | -0.958044 |
| H | -2.941170 | -1.581186 | -1.954314 |
| H | -2.145678 | -2.129828 | -0.445510 |
| C | -2.260662 | 1.131461  | -1.065091 |
| H | -2.240896 | 1.574773  | -2.064901 |
| N | -1.603440 | -0.202715 | -1.123459 |
| C | -0.331817 | -0.326730 | -1.456493 |
| H | 0.146689  | 0.627859  | -1.679451 |
| C | 0.526183  | -1.423163 | -1.321492 |
| H | 1.477645  | -1.233277 | -1.809817 |
| C | -3.694939 | 0.836790  | -0.598427 |
| H | -4.379191 | 0.973487  | -1.439258 |
| H | -3.993079 | 1.524431  | 0.194608  |
| C | 0.161388  | -2.889852 | -1.225293 |
| H | 1.081822  | -3.479234 | -1.234530 |
| H | -0.439750 | -3.215530 | -2.080237 |
| H | -0.371023 | -3.124773 | -0.303433 |

---

**TS1-Z2-RS** E = -1031.57832398 (1)

|   |           |           |           |
|---|-----------|-----------|-----------|
| C | -2.989418 | -1.611152 | 1.541735  |
| H | -3.187879 | -2.368812 | 2.301387  |
| H | -3.031031 | -0.622613 | 2.010546  |
| C | -1.626740 | -1.796839 | 0.876752  |
| H | -1.410192 | -2.855514 | 0.692901  |
| H | -0.812107 | -1.342619 | 1.440841  |
| C | -3.210781 | -0.862730 | -0.729111 |
| H | -3.412500 | -1.252750 | -1.729243 |
| N | -1.794100 | -1.064134 | -0.388353 |
| C | -0.809906 | -0.429275 | -1.019179 |
| H | -1.154174 | 0.361622  | -1.687282 |
| C | 0.567308  | -0.701973 | -0.960201 |
| H | 1.096597  | -0.227702 | -1.780772 |
| C | -3.947086 | -1.678465 | 0.350903  |
| H | -4.061620 | -2.713655 | 0.015398  |
| H | -4.938753 | -1.269283 | 0.545989  |
| C | 1.048998  | -2.098924 | -0.616801 |
| H | 2.062130  | -2.242526 | -0.995527 |
| H | 0.405771  | -2.863266 | -1.065577 |
| H | 1.082562  | -2.287679 | 0.462688  |

|   |           |           |           |   |           |           |           |
|---|-----------|-----------|-----------|---|-----------|-----------|-----------|
| C | -1.416433 | 2.083801  | -0.192027 | C | -3.746983 | 0.585690  | -0.755974 |
| O | -0.526514 | 2.709579  | -0.730386 | O | -4.774135 | 0.767108  | -1.363016 |
| O | -1.701952 | 2.200447  | 1.086221  | O | -3.127557 | 1.544014  | -0.102707 |
| H | -1.895880 | 1.314445  | 1.586396  | H | -2.295259 | 1.324128  | 0.417813  |
| C | 0.204917  | -0.137533 | 1.336259  | C | 1.130364  | 1.805284  | 0.436474  |
| H | 0.299357  | 0.915890  | 1.550566  | H | 1.714094  | 2.621792  | 0.041789  |
| C | 1.148399  | -0.881556 | 0.594493  | C | 1.518574  | 0.459772  | 0.472018  |
| H | 1.177427  | -1.945639 | 0.823820  | H | 1.067913  | -0.141428 | 1.256407  |
| N | -0.952363 | -0.711372 | 1.743133  | N | -0.150180 | 2.125387  | 0.781875  |
| O | -1.184365 | -1.918850 | 1.558363  | O | -0.910064 | 1.158640  | 1.138797  |
| O | -1.834331 | 0.020434  | 2.323104  | O | -0.575130 | 3.273945  | 0.704055  |
| C | 2.454280  | -0.239802 | 0.309519  | C | 2.935952  | 0.143789  | 0.168737  |
| C | 4.938584  | 0.920131  | -0.246288 | C | 5.615095  | -0.459506 | -0.375000 |
| C | 3.618990  | -1.013914 | 0.324813  | C | 3.637559  | -0.760389 | 0.971317  |
| C | 2.543387  | 1.122886  | -0.004783 | C | 3.591585  | 0.735724  | -0.917244 |
| C | 3.780927  | 1.695128  | -0.278239 | C | 4.921409  | 0.436980  | -1.186632 |
| C | 4.855139  | -0.436816 | 0.055192  | C | 4.970948  | -1.056592 | 0.704724  |
| H | 3.551467  | -2.072649 | 0.561462  | H | 3.135157  | -1.223837 | 1.815918  |
| H | 1.646473  | 1.738402  | -0.047780 | H | 3.048664  | 1.426281  | -1.557516 |
| H | 3.839166  | 2.751236  | -0.519944 | H | 5.417980  | 0.901211  | -2.032324 |
| H | 5.752582  | -1.046232 | 0.081115  | H | 5.505874  | -1.754406 | 1.340465  |
| H | 5.901854  | 1.371841  | -0.459394 | H | 6.653363  | -0.692850 | -0.586453 |

---

**Table S2.** NBO atomic charge of pyrrolidine nitrogen,  $q(\text{N})$ , of selected transition states, enamine and iminium, calculated at M06-2X/6-31G\*\* level.

| structure                          | $q(\text{N})$ | structure                         | $q(\text{N})$ |
|------------------------------------|---------------|-----------------------------------|---------------|
| <b>TS1-<math>\alpha</math>1-RS</b> | -0.412        | <b>TS1-<math>\beta</math>2-SR</b> | -0.424        |
| <b>TS1-<math>\alpha</math>1-SR</b> | -0.407        | <b>TS1-<math>\beta</math>3-RS</b> | -0.393        |
| <b>TS1-<math>\beta</math>1-RS</b>  | -0.393        | <b>TS1-<math>\beta</math>3-SR</b> | -0.385        |
| <b>TS1-<math>\beta</math>1-SR</b>  | -0.391        | enamine-1 ( <b>E2</b> )           | -0.548        |
| <b>TS1-<math>\beta</math>2-RS</b>  | -0.420        | iminium-1                         | -0.314        |

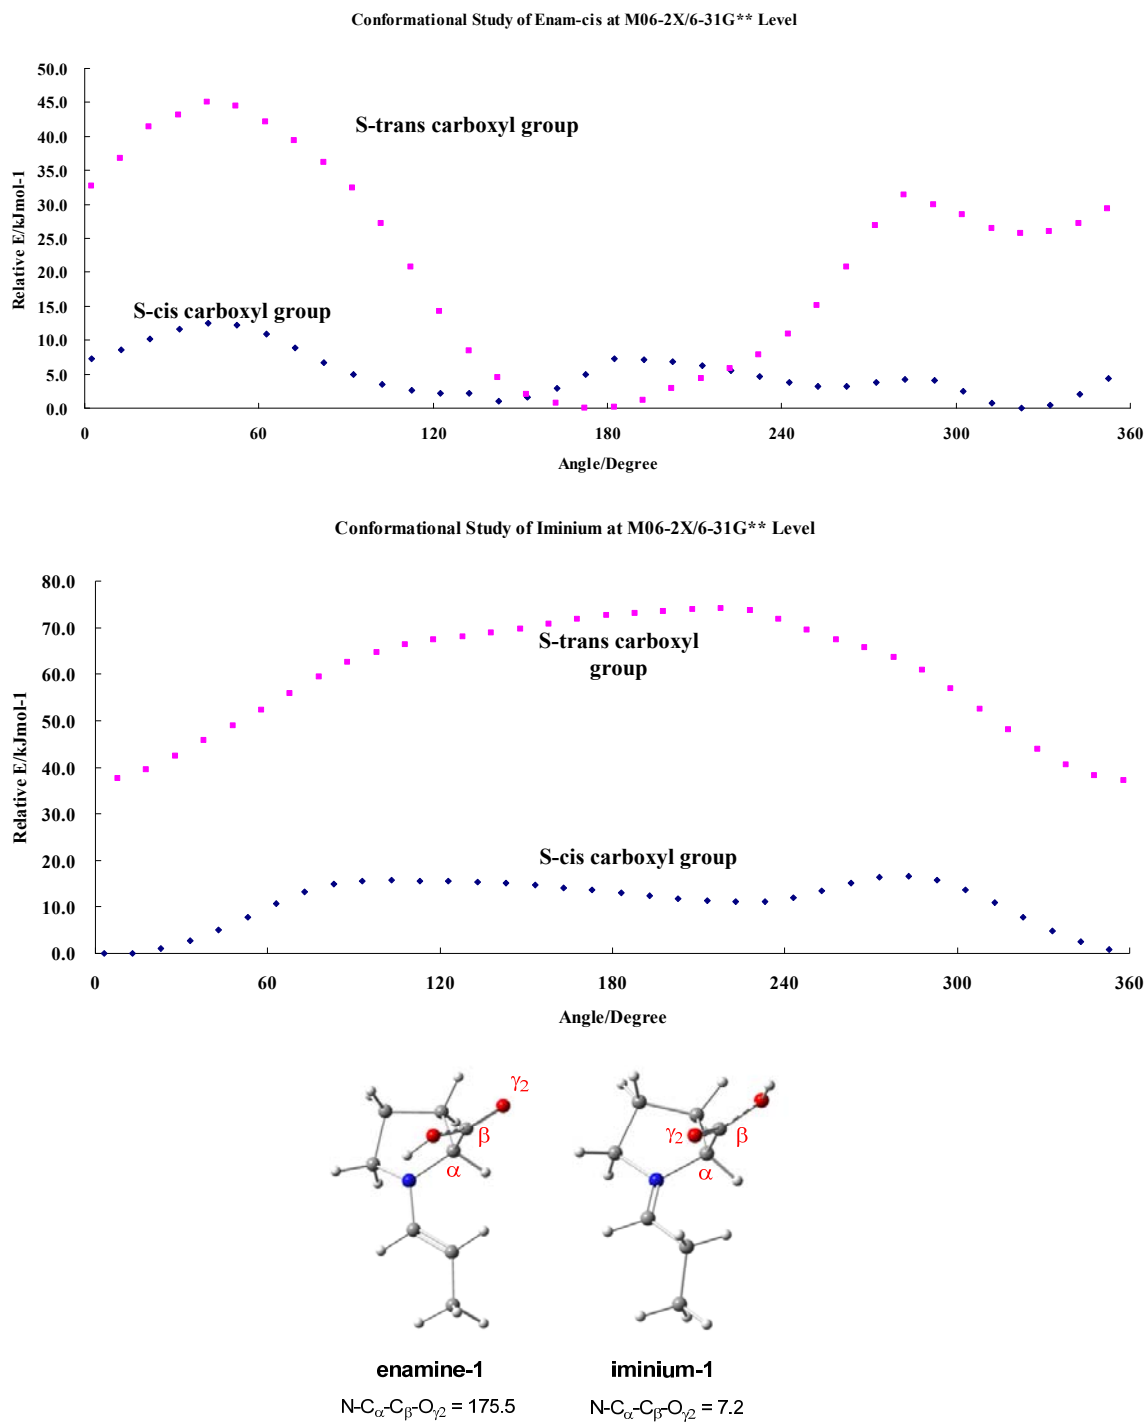

**Figure S1.** Conformational studies of *cis*-enamine and an iminium ion, with respect to the torsional angle of  $N-C_{\alpha}-C_{\beta}-O_{\gamma_2}$ , at M06-2X/6-31G\*\* level of theory. The optimized geometries of the most favorable enamine and iminium conformations are given at the bottom.

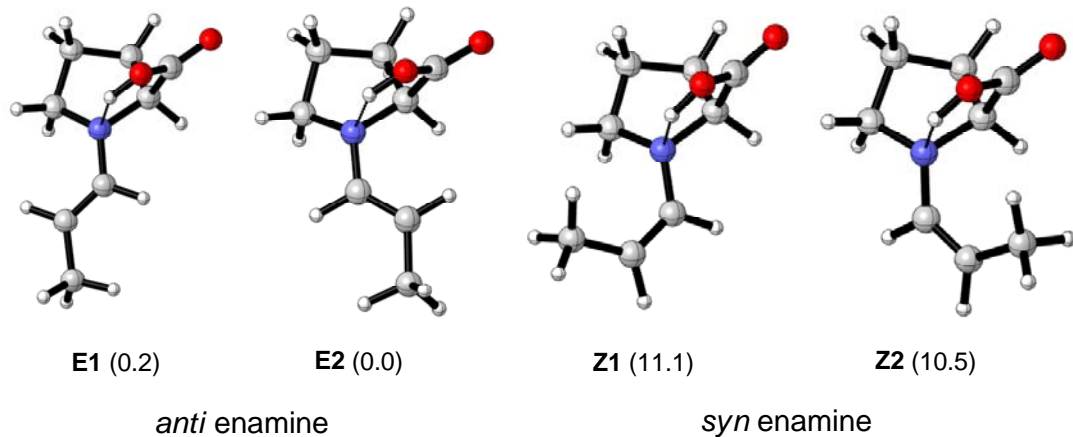

**Figure S2.** M06-2X/6-31G\*\* optimized geometries of the *anti* and *syn* conformations of enamine. Calculated relative enthalpies (MP2/6-311+G\*\*/M06-2X/6-31G\*,  $\Delta H_{298}$ , kJ mol<sup>-1</sup>) are given parenthesis.



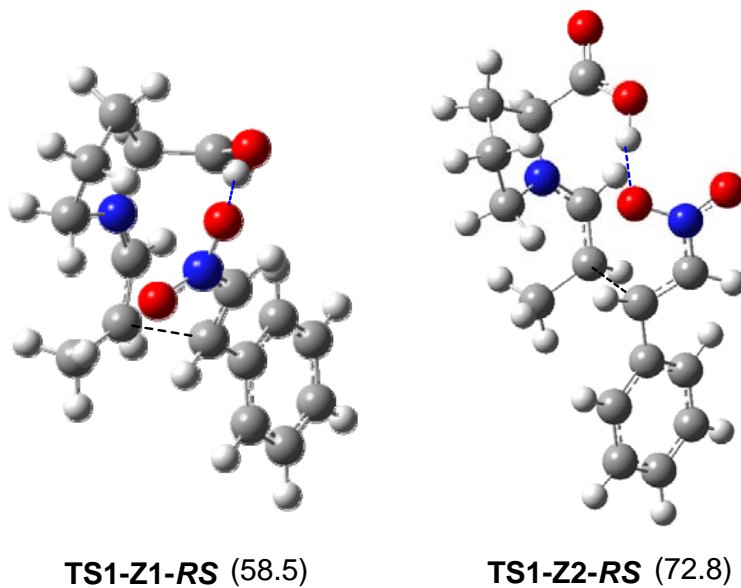

**Figure S3.** M06-2X/6-31G\*\* optimized geometries of transition states derived from *Z*-enamine leading to (*R,S*) product of reaction (1). Calculated relative enthalpies (MP2/6-311+G\*\*/M06-2X/6-31G\*,  $\Delta H_{298}$ , kJ mol<sup>-1</sup>), in parenthesis, with respect to **TS1- $\beta$ 1-RS**.
